# Supplementary material for: Combined mass spectrometry-guided genome mining and virtual screening for acaricidal activity in secondary metabolites of Bacillus velezensis W1
Source: Royal Society of Chemistry journal article supplement (doi:10.1039/d1ra01326b), 2021-01-01
Supplement: d1ra01326b1.pdf [file d1ra01326b1.pdf]

**Journal: RSC Advances**

**Combined Mass Spectrometry-Guided Genome Mining and Virtual  
Screening for Acaricidal Active Secondary Metabolites of *Bacillus  
velezensis* W1**

Xingyu Li<sup>a,b,‡\*</sup>, Shahzad Munir<sup>c,‡</sup>, Yan Xu<sup>b</sup>, Yuehu Wang<sup>d</sup>, Yueqiu He<sup>c,\*</sup>

<sup>a</sup>College of Science, Yunnan Agricultural University, Kunming 650201, PRC

<sup>b</sup>Department of Chemistry, Cleveland State University, Cleveland, OH 44115, USA

<sup>c</sup>State Key Laboratory for Conservation and Utilization of Bio-resources in Yunnan, Yunnan  
Agricultural University, Kunming 650201, Yunnan, China

<sup>d</sup>Key Laboratory of Economic Plants and Biotechnology, Chinese Academy of Sciences, Kunming  
650201, China

\*Corresponding author: [lixingyu@ynau.edu.cn](mailto:lixingyu@ynau.edu.cn) (X.-Y. Li); [ynfh2007@163.com](mailto:ynfh2007@163.com) (Y.-Q. He.)

‡Equal Contribution

## Content

|                                                                                                                                                                                                                                                                                                                                  |    |
|----------------------------------------------------------------------------------------------------------------------------------------------------------------------------------------------------------------------------------------------------------------------------------------------------------------------------------|----|
| <b>Figure S1.</b> GC-MS chromatogram of petroleum ether extraction part (PO98) of the crude extract of strain W1, including <b>S1.1:</b> total ion chromatograph (TIC), <b>S1.2:</b> area percent report, and <b>S1.3:</b> MS spectra of identified compound and the comparison of the MS spectra of its standard products. .... | 3  |
| <b>Figure S2.</b> GC-MS chromatogram of ethyl acetate extraction part (PO99) of the crude extract of W1, including <b>S2.1:</b> total ion chromatograph (TIC), <b>S2.2:</b> area percent report, and <b>S2.3:</b> MS spectra of identified compound and the comparison of the MS spectra of its standard products. .             | 14 |
| <b>Figure S3.</b> GC-MS chromatogram of acetone extraction part (PO100) of the crude extract of W1, including <b>S3.1:</b> total ion chromatograph (TIC), <b>S3.2:</b> area percent report, and <b>S3.3:</b> MS spectra of identified compound and the comparison of the MS spectra of its standard products. ....               | 23 |
| <b>Figure S4 A:</b> LC-ESI-MS spectrum and structure of the bacillomycin D C15. <b>B:</b> ESI-MS/MS spectrum of the precursor ion $[M + H]^+$ at $m/z$ 1,045.5501 with fragment ions analysis. ....                                                                                                                              | 36 |
| <b>Figure S5 A:</b> LC-ESI-MS spectrum and structure of the bacillomycin D C16. <b>B:</b> ESI-MS/MS spectrum of the precursor ion $[M + H]^+$ at $m/z$ 1,059.5629 with fragment ions analysis. ....                                                                                                                              | 38 |
| <b>Figure S6 A:</b> LC-ESI-MS spectrum and structure of the bacillomycin D C17. ....                                                                                                                                                                                                                                             | 39 |
| Table S1. Information of Known Acaricidal Compounds .....                                                                                                                                                                                                                                                                        | 40 |
| Table S2. Compounds identified from <i>Bacillus velezensis</i> W1 and the maximum similarity .....                                                                                                                                                                                                                               | 42 |

**Figure S1.** GC-MS chromatogram of petroleum ether extraction part (PO98) of the crude extract of strain W1, including **S1.1:** total ion chromatograph (TIC), **S1.2:** area percent report, and **S1.3:** MS spectra of identified compound and the comparison of the MS spectra of its standard products.

**S1.1:** Total Ion Chromatograph (TIC)

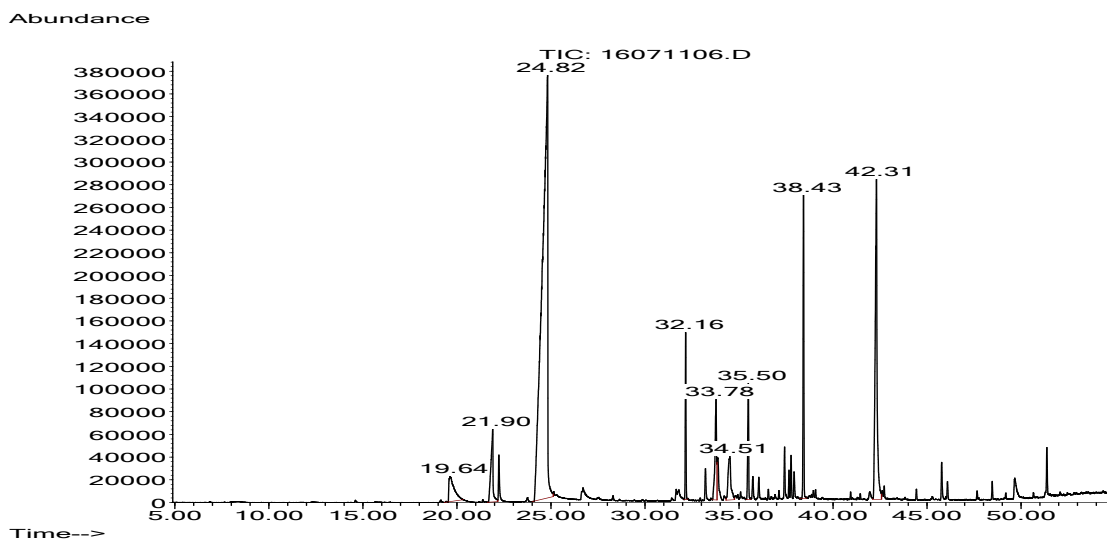

## S1.2: Area Percent Report

Data File : C:\MSDCHEM\1\DATA\16071106.D Vial: 1  
Acq On : 11 Jul 2016 17:50 Operator:  
Sample : P098 Inst : GCMS  
Misc : Multiplr: 1.00  
Sample Amount: 0.00

MS Integration Params: autoint1.e

Method : C:\MSDCHEM\1\METHODS\D-DDVP.M (Chemstation Integrator)  
Title :

Signal : TIC

| peak # | R.T. min | first scan | max scan | last scan | PK TY | peak height | corr. area | corr. % max | % of total |
|--------|----------|------------|----------|-----------|-------|-------------|------------|-------------|------------|
| 1      | 19.639   | 3187       | 3212     | 3391      | BB 4  | 22539       | 4921109    | 6.38%       | 3.183%     |
| 2      | 21.899   | 3555       | 3635     | 3686      | PV    | 63739       | 5076274    | 6.58%       | 3.284%     |
| 3      | 22.235   | 3686       | 3698     | 3764      | VB 2  | 40858       | 1649510    | 2.14%       | 1.067%     |
| 4      | 23.758   | 3901       | 3983     | 4009      | BB 6  | 3621        | 251334     | 0.33%       | 0.163%     |
| 5      | 24.816   | 4015       | 4181     | 4238      | BV 3  | 372590      | 77123138   | 100.00%     | 49.890%    |
| 6      | 25.152   | 4238       | 4244     | 4260      | VV 9  | 5982        | 275448     | 0.36%       | 0.178%     |
| 7      | 25.302   | 4260       | 4272     | 4300      | VB 9  | 2871        | 208920     | 0.27%       | 0.135%     |
| 8      | 26.707   | 4489       | 4535     | 4610      | BB 5  | 9765        | 1248206    | 1.62%       | 0.807%     |
| 9      | 31.664   | 5449       | 5463     | 5472      | VV 3  | 9904        | 420998     | 0.55%       | 0.272%     |
| 10     | 31.803   | 5472       | 5489     | 5540      | VV 3  | 9119        | 897952     | 1.16%       | 0.581%     |
| 11     | 32.167   | 5540       | 5557     | 5576      | PV    | 148323      | 3789323    | 4.91%       | 2.451%     |
| 12     | 33.219   | 5739       | 5754     | 5795      | BV 3  | 28292       | 1134958    | 1.47%       | 0.734%     |
| 13     | 33.780   | 5822       | 5859     | 5869      | VV 4  | 88560       | 5137624    | 6.66%       | 3.323%     |
| 14     | 33.865   | 5869       | 5875     | 5929      | VV 3  | 37357       | 2387147    | 3.10%       | 1.544%     |
| 15     | 34.218   | 5929       | 5941     | 5958      | PV 3  | 3831        | 222608     | 0.29%       | 0.144%     |
| 16     | 34.512   | 5958       | 5996     | 6042      | VV    | 38756       | 3913411    | 5.07%       | 2.532%     |
| 17     | 35.084   | 6088       | 6103     | 6126      | PV 8  | 6465        | 257646     | 0.33%       | 0.167%     |
| 18     | 35.495   | 6162       | 6180     | 6201      | BV    | 102458      | 3668200    | 4.76%       | 2.373%     |
| 19     | 35.741   | 6201       | 6226     | 6255      | VV 4  | 20582       | 888392     | 1.15%       | 0.575%     |
| 20     | 36.056   | 6255       | 6285     | 6313      | PV 2  | 19559       | 782166     | 1.01%       | 0.506%     |
| 21     | 36.563   | 6358       | 6380     | 6393      | BV    | 8849        | 240030     | 0.31%       | 0.155%     |
| 22     | 36.921   | 6424       | 6447     | 6473      | VV    | 4369        | 242178     | 0.31%       | 0.157%     |
| 23     | 37.124   | 6473       | 6485     | 6513      | VB 5  | 7918        | 247108     | 0.32%       | 0.160%     |
| 24     | 37.423   | 6514       | 6541     | 6575      | BV    | 45893       | 1581550    | 2.05%       | 1.023%     |
| 25     | 37.658   | 6575       | 6585     | 6594      | VV 2  | 25771       | 674153     | 0.87%       | 0.436%     |
| 26     | 37.771   | 6594       | 6606     | 6623      | VV    | 38911       | 1236200    | 1.60%       | 0.800%     |
| 27     | 37.931   | 6623       | 6636     | 6663      | VV 3  | 23813       | 948979     | 1.23%       | 0.614%     |
| 28     | 38.433   | 6708       | 6730     | 6759      | PV    | 269532      | 7886157    | 10.23%      | 5.101%     |
| 29     | 38.957   | 6821       | 6828     | 6841      | VV    | 7532        | 278026     | 0.36%       | 0.180%     |
| 30     | 39.074   | 6841       | 6850     | 6873      | VV 6  | 8409        | 256730     | 0.33%       | 0.166%     |
| 31     | 41.959   | 7363       | 7390     | 7418      | BV 4  | 7059        | 535459     | 0.69%       | 0.346%     |
| 32     | 42.306   | 7418       | 7455     | 7506      | VV    | 280736      | 19836882   | 25.72%      | 12.832%    |
| 33     | 42.621   | 7506       | 7514     | 7525      | VV 10 | 7596        | 317337     | 0.41%       | 0.205%     |

|    |        |      |      |      |      |       |         |       |        |
|----|--------|------|------|------|------|-------|---------|-------|--------|
| 34 | 42.723 | 7525 | 7533 | 7562 | VV 5 | 11490 | 406559  | 0.53% | 0.263% |
| 35 | 44.438 | 7828 | 7854 | 7886 | BB 4 | 9591  | 284021  | 0.37% | 0.184% |
| 36 | 45.779 | 8057 | 8105 | 8138 | BV 2 | 33010 | 1152655 | 1.49% | 0.746% |
| 37 | 46.089 | 8152 | 8163 | 8183 | VB 6 | 16280 | 516667  | 0.67% | 0.334% |
| 38 | 48.466 | 8547 | 8608 | 8623 | BV   | 16066 | 414358  | 0.54% | 0.268% |
| 39 | 49.187 | 8672 | 8743 | 8765 | BB 7 | 5256  | 234943  | 0.30% | 0.152% |
| 40 | 49.668 | 8772 | 8833 | 8912 | BV 7 | 18376 | 1751731 | 2.27% | 1.133% |
| 41 | 51.372 | 9056 | 9152 | 9176 | BV 4 | 42452 | 1290516 | 1.67% | 0.835% |

### S1.3: MS Spectra of identified Compound and the Comparison of the MS Spectra of Its Standard Products.

#### 1. Comparison of Mass Spectra of **2-piperidinone** and Its Standards

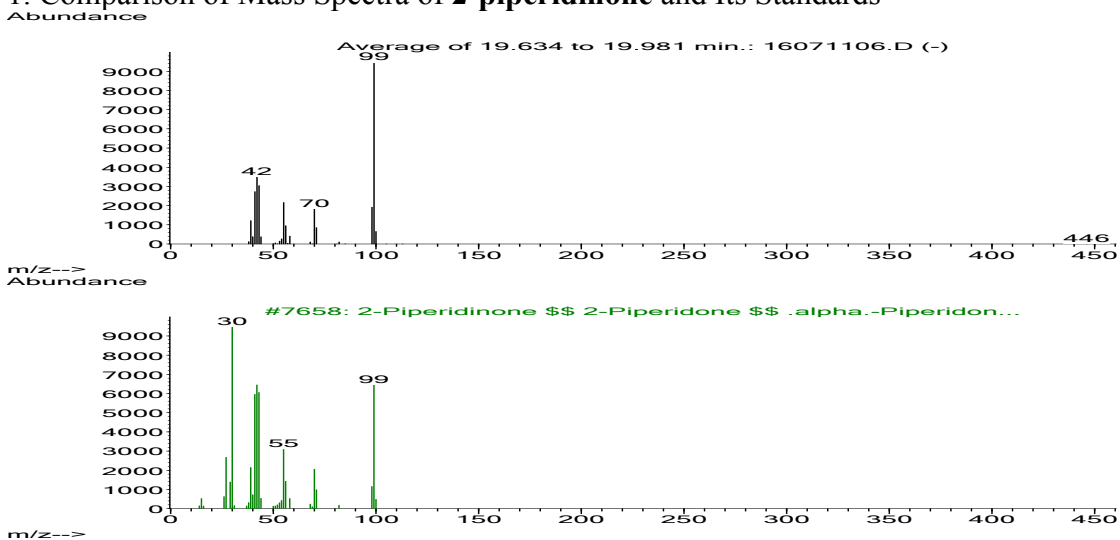

#### 2. Comparison of Mass Spectra of **Benzeneacetic Acid** and Its Standards

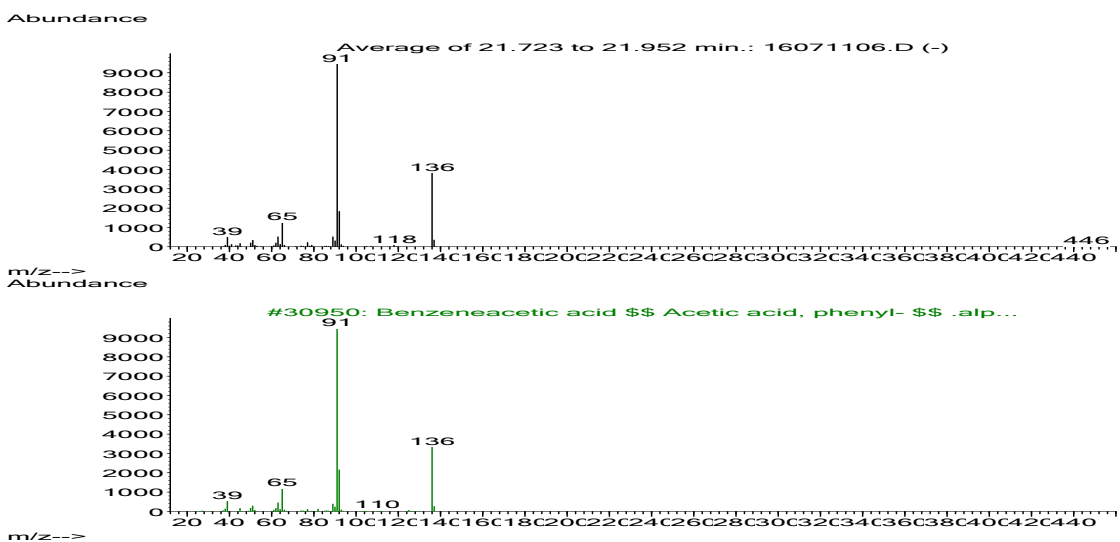

### 3. Comparison of Mass Spectra of Methyl Ester Benzenepropanoic Acid and Its Standards

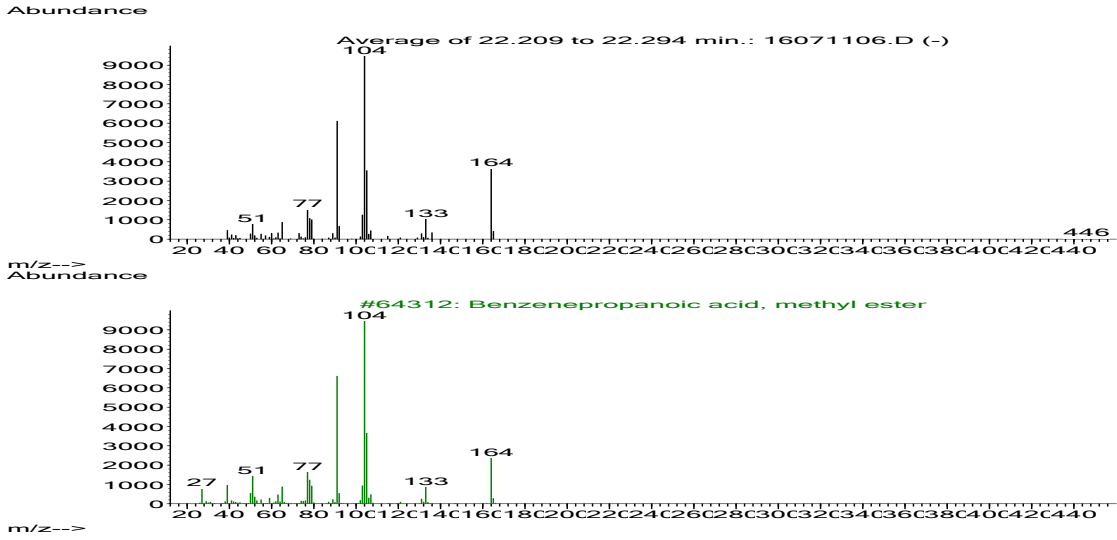

### 4. Comparison of Mass Spectra of Benzenepropanoic Acid and Its Standards

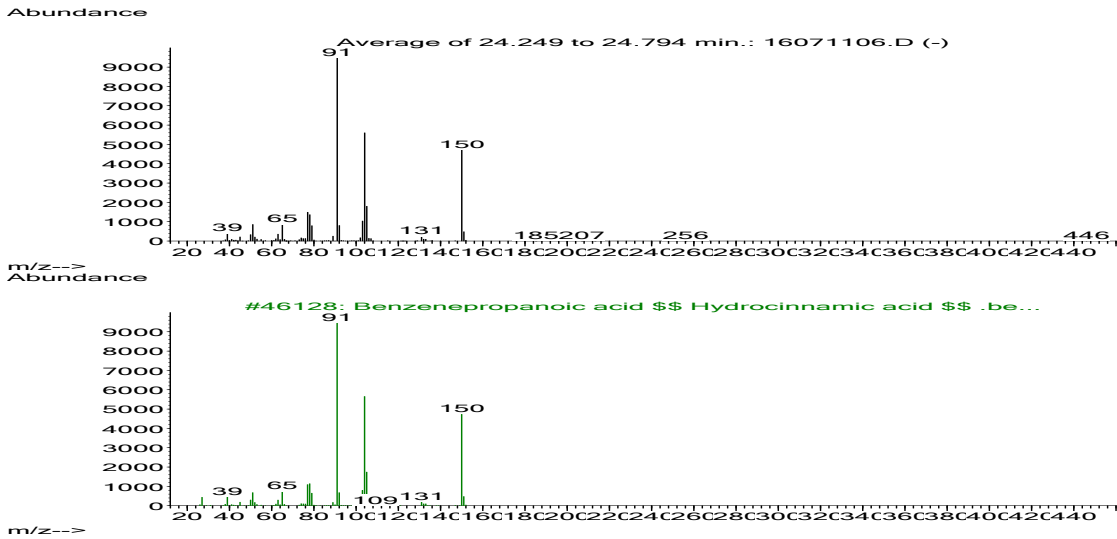

## 5. Comparison of Mass Spectra of **Benzenebutanoic Acid** and Its Standards

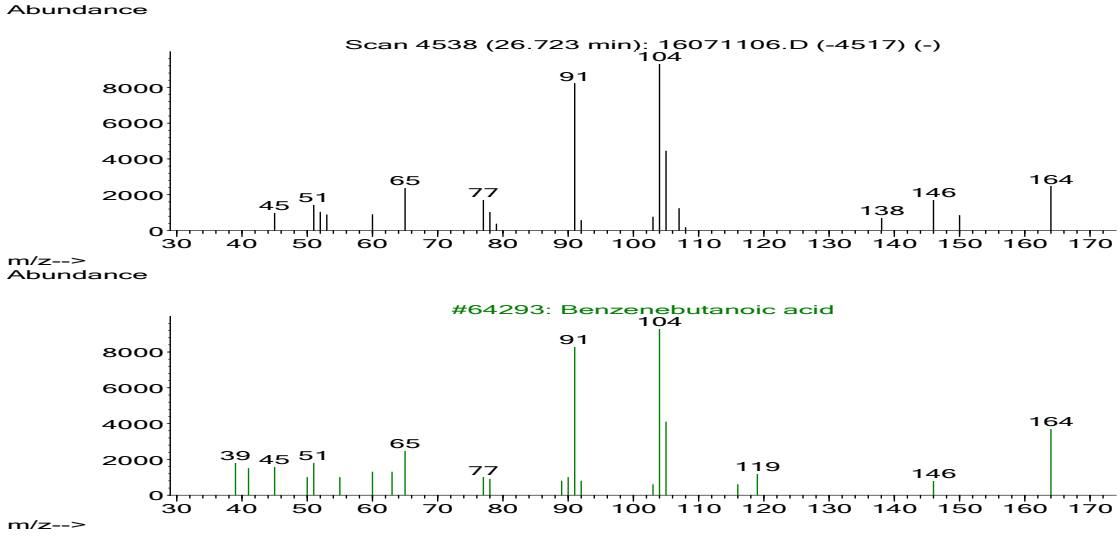

## 6. Comparison of Mass Spectra of **Cyclo(val-ala) Dipeptide** and Its Standards

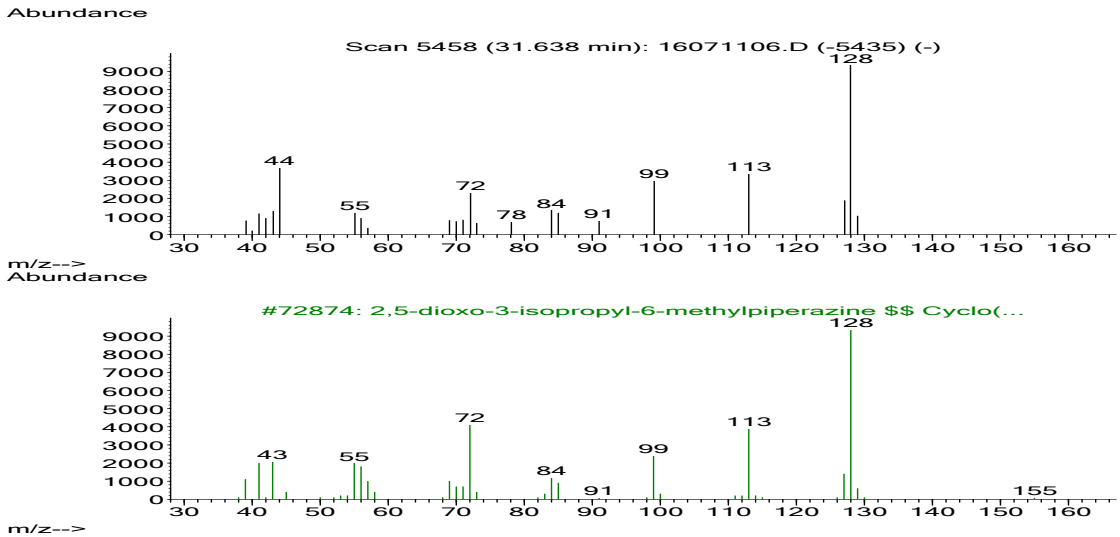

## 7. Mass Spectra of **Cyclo (Gly-L-Pro) Dipeptide**

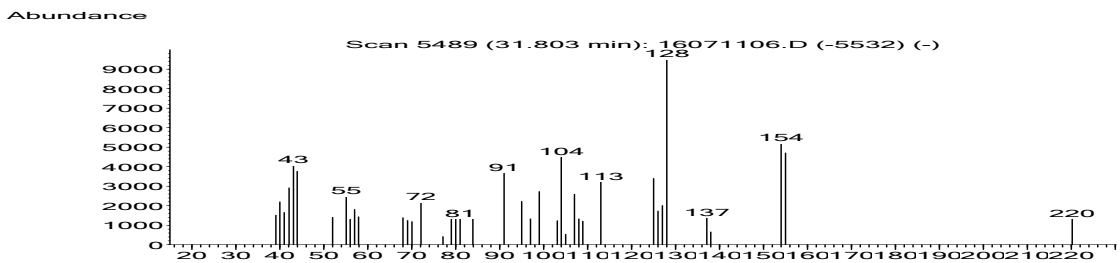



## 8. Comparison of Mass Spectra of 1,2,3-Propanetricarboxylic Acid, 2-Hydroxy-, Triethyl Ester and Its Standards

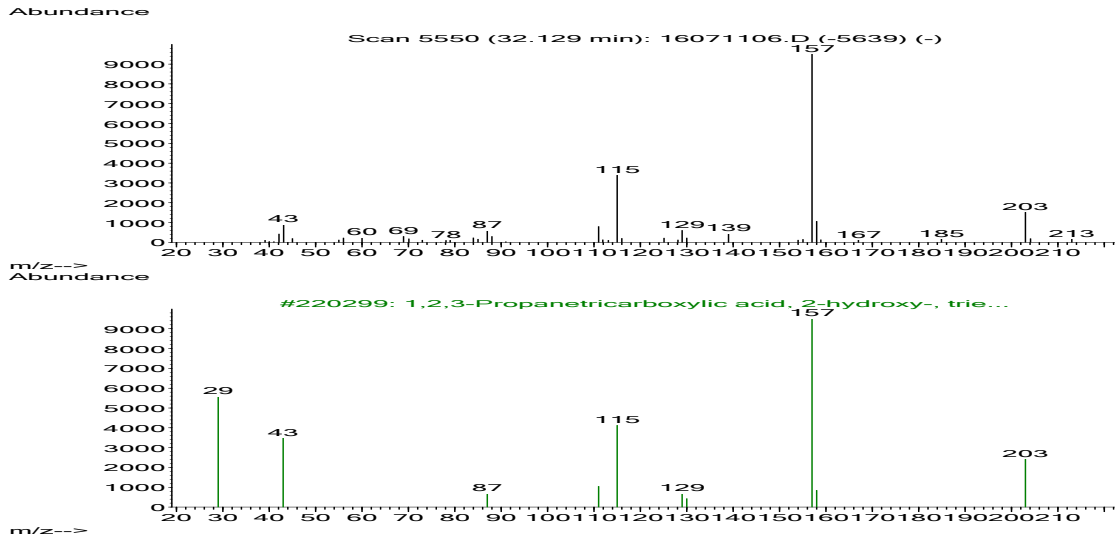

## 9. Mass Spectra of Cyclo (L-Ala-L-Pro) Dipeptide

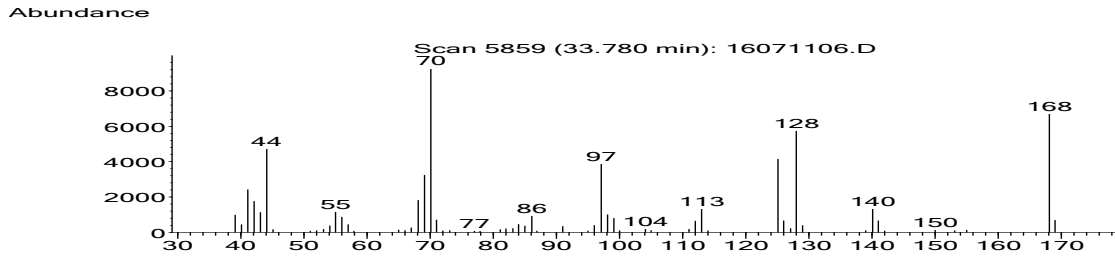

## 10. Mass Spectra of Cyclo(gly-L-Val) Dipeptide

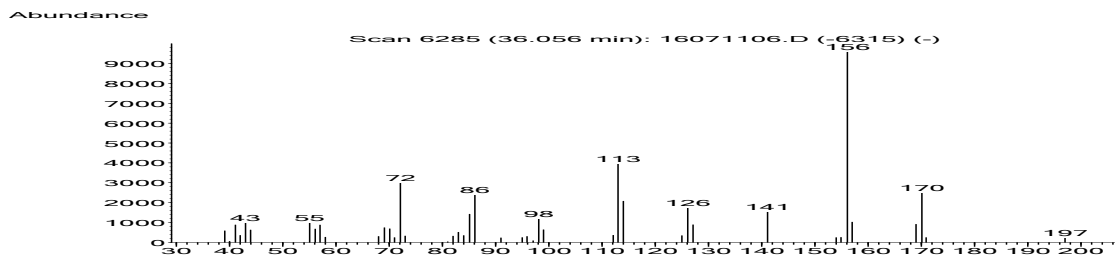

## 11. Comparison of Mass Spectra of **Nonadecane** and Its Standards

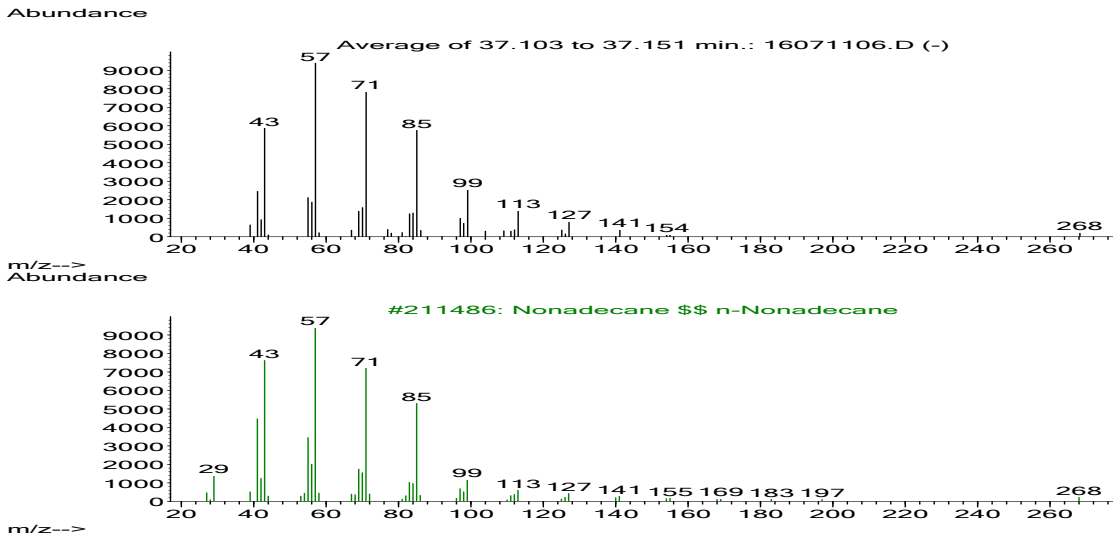

## 12. Comparison of Mass Spectra of **Hexadecanoic Acid, Methyl Ester** and Its Standards

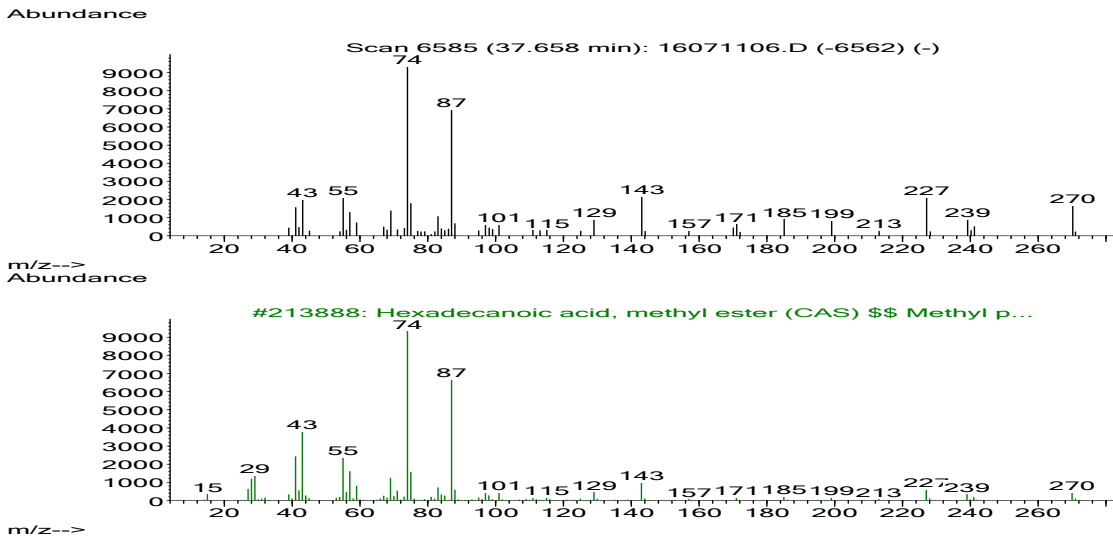

### 13 Comparison of Mass Spectra of Cyclo (L-Pro-L-Pro) Dipeptide and Its Standards

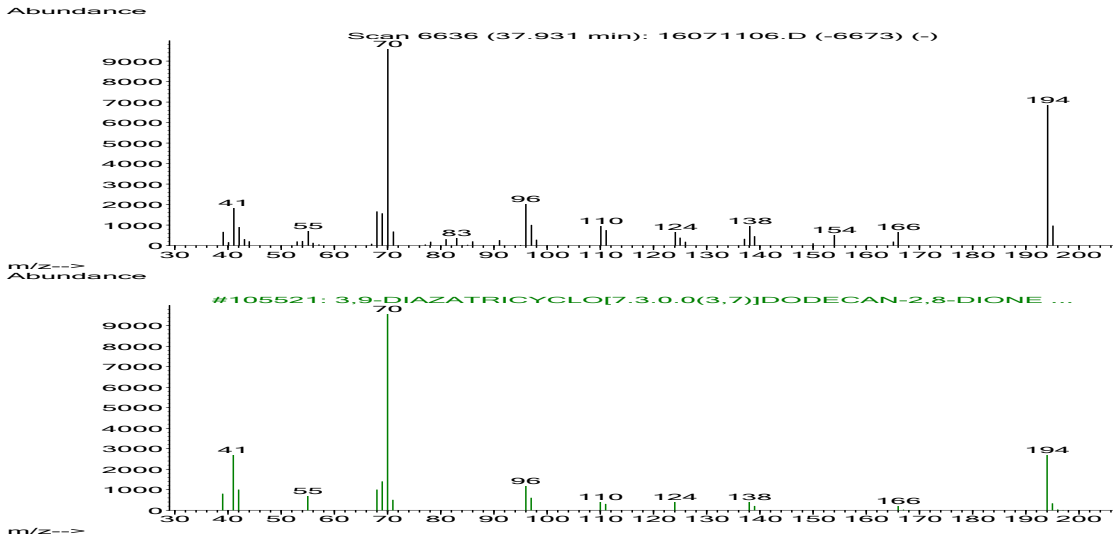

### 14. Comparison of Mass Spectra of Icosane and Its Standards

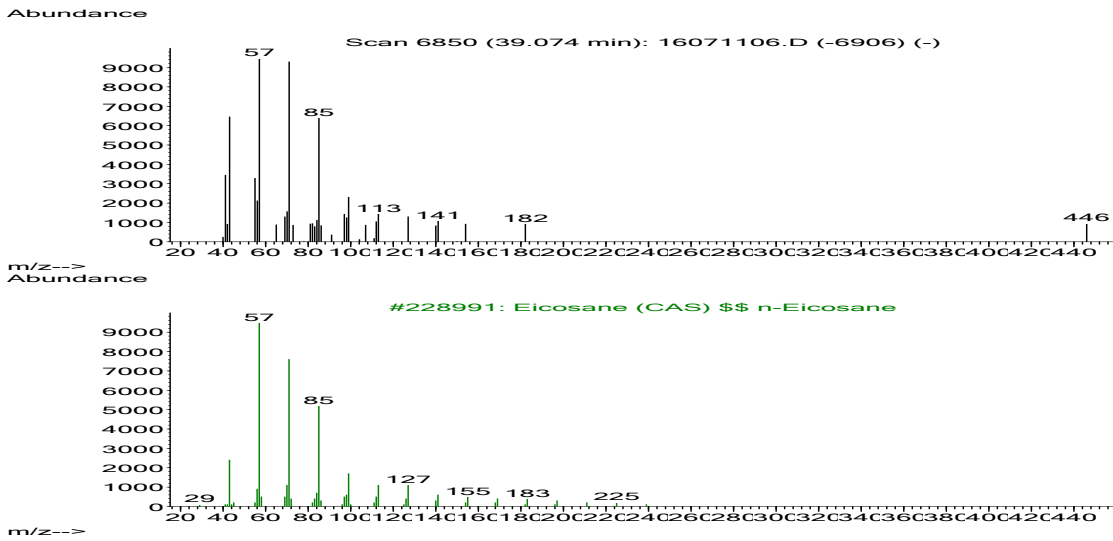

### 15. Mass Spectra of Cyclo(Gly-L-Leu) Dipeptide

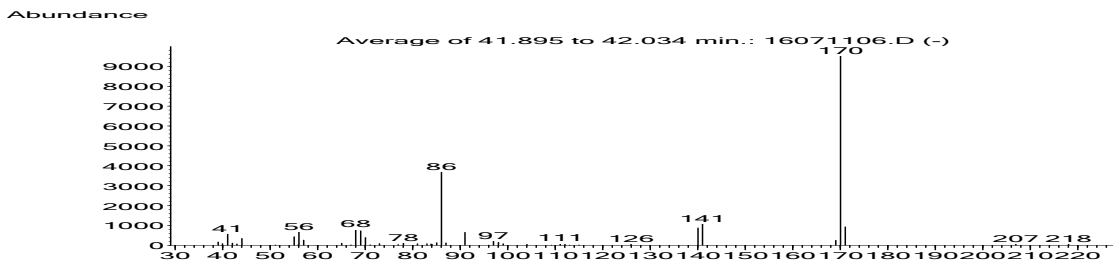

## 16. Comparison of Mass Spectra of Cyclo (L-Leu-L-Leu) Dipeptide and Its Standards

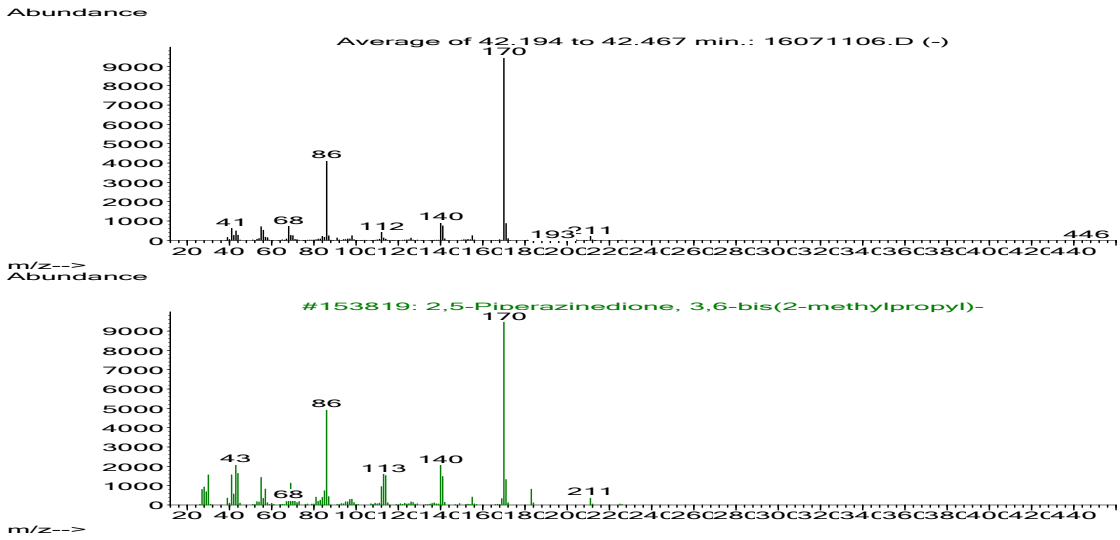

## 17. Comparison of Mass Spectra of Docosane and Its Standards

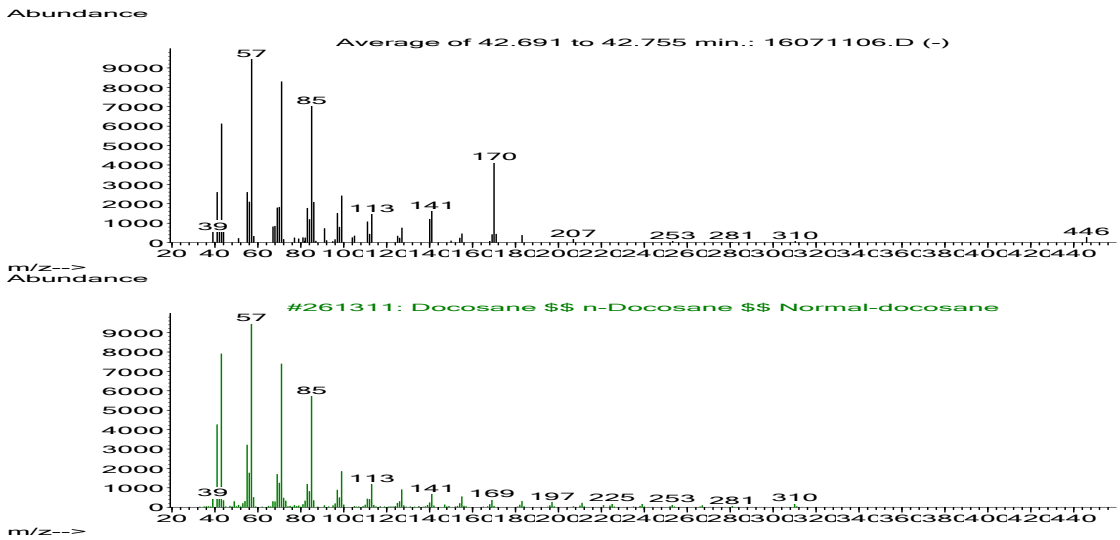

### 18. Comparison of Mass Spectra of Cyclo (L-Phe-L-Pro) Dipeptide and Its Standards

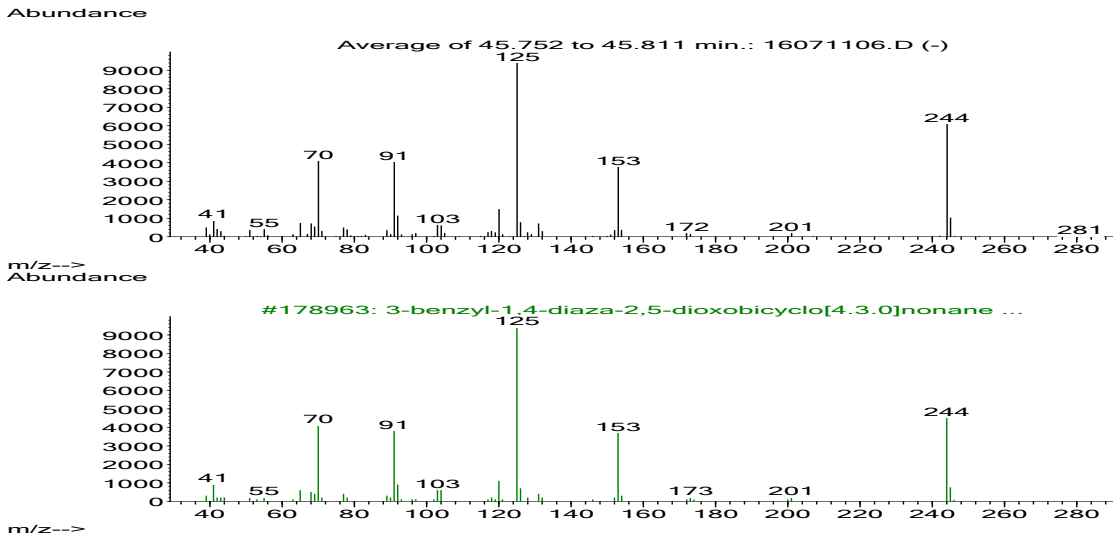

### 19. Comparison of Mass Spectra of Cyclo (L-Phe-L-Leu) Dipeptide and Its Standards

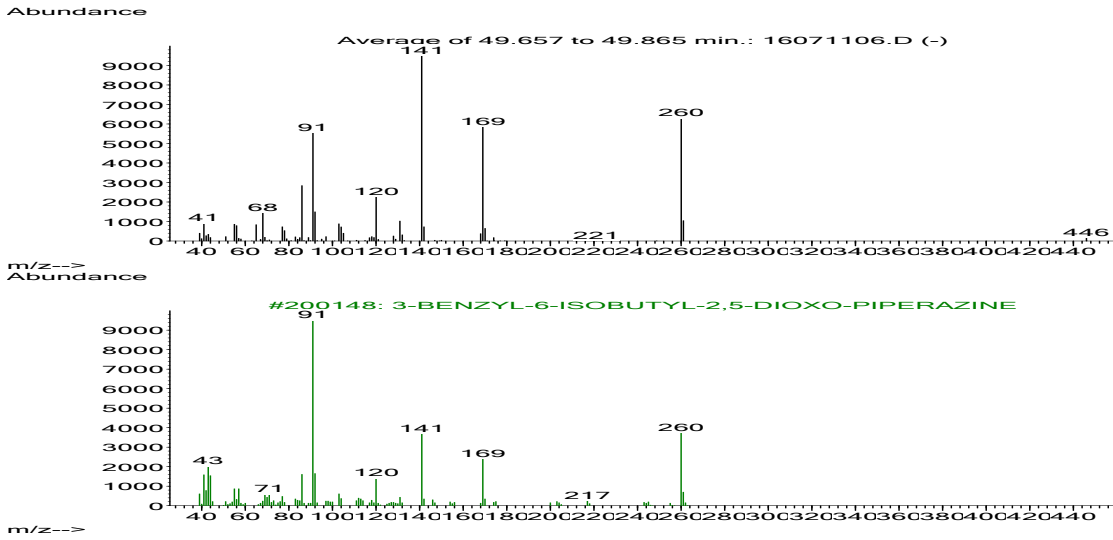

**Figure S2.** GC-MS chromatogram of ethyl acetate extraction part (PO99) of the crude extract of W1, including **S2.1:** total ion chromatograph (TIC), **S2.2:** area percent report, and **S2.3:** MS spectra of identified compound and the comparison of the MS spectra of its standard products.

**S2.1:** Total Ion Chromatograph (TIC)

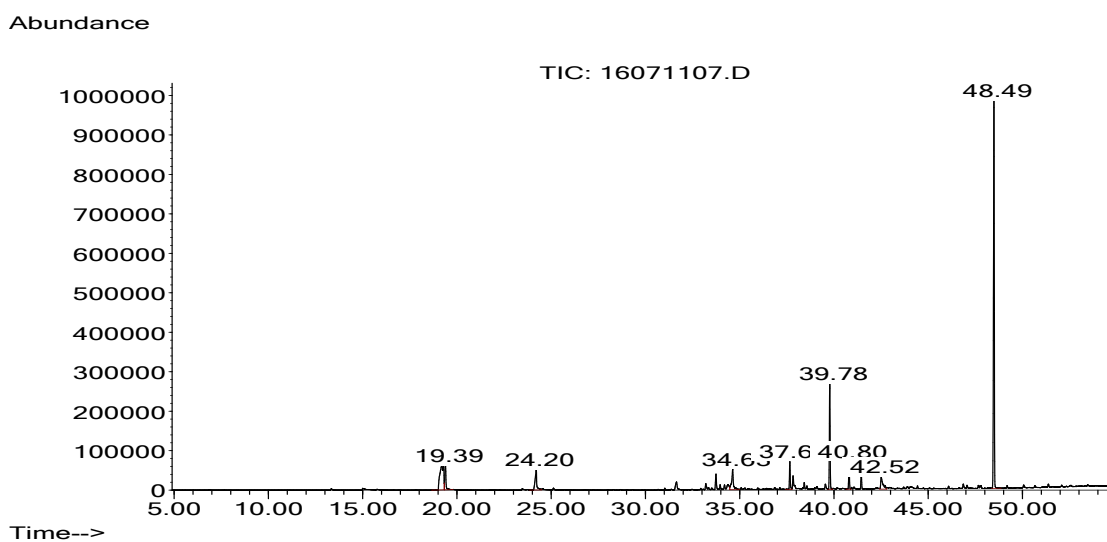

## S2.2: Area Percent Report

Data File : C:\MSDCHEM\1\DATA\16071107.D Vial: 1  
 Acq On : 11 Jul 2016 19:25 Operator:  
 Sample : P099 Inst : GCMS  
 Misc : Multiplr: 1.00  
 Sample Amount: 0.00  
 MS Integration Params: autoint1.e

Method : C:\MSDCHEM\1\METHODS\D-DDVP.M (Chemstation Integrator)  
 Title :

Signal : TIC

| peak # | R.T. min | first scan | max scan | last scan | PK TY | peak height | corr. area | corr. % max. | % of total |
|--------|----------|------------|----------|-----------|-------|-------------|------------|--------------|------------|
| 1      | 13.346   | 1989       | 2034     | 2097      | BB 4  | 3356        | 177106     | 0.59%        | 0.193%     |
| 2      | 15.018   | 2300       | 2347     | 2472      | BV 2  | 4310        | 670757     | 2.25%        | 0.732%     |
| 3      | 15.771   | 2472       | 2488     | 2557      | VB 6  | 2221        | 205971     | 0.69%        | 0.225%     |
| 4      | 19.201   | 3058       | 3130     | 3155      | BV 5  | 64462       | 8722569    | 29.24%       | 9.525%     |
| 5      | 19.393   | 3155       | 3166     | 3238      | VV    | 60053       | 2912780    | 9.76%        | 3.181%     |
| 6      | 19.821   | 3238       | 3246     | 3333      | VB 6  | 1901        | 179980     | 0.60%        | 0.197%     |
| 7      | 23.475   | 3880       | 3930     | 3965      | BV    | 3576        | 232640     | 0.78%        | 0.254%     |
| 8      | 24.201   | 4021       | 4066     | 4118      | PV 2  | 50476       | 3206514    | 10.75%       | 3.502%     |
| 9      | 24.549   | 4118       | 4131     | 4215      | VB 8  | 3355        | 329144     | 1.10%        | 0.359%     |
| 10     | 25.125   | 4221       | 4239     | 4271      | BV 6  | 4662        | 180168     | 0.60%        | 0.197%     |
| 11     | 31.643   | 5436       | 5459     | 5509      | VV 3  | 20206       | 1430975    | 4.80%        | 1.563%     |
| 12     | 32.936   | 5661       | 5701     | 5712      | VV 7  | 4274        | 184078     | 0.62%        | 0.201%     |
| 13     | 33.208   | 5737       | 5752     | 5771      | VV 7  | 15372       | 723590     | 2.43%        | 0.790%     |
| 14     | 33.347   | 5771       | 5778     | 5797      | VV 9  | 6513        | 258213     | 0.87%        | 0.282%     |
| 15     | 33.523   | 5797       | 5811     | 5834      | VV 6  | 5135        | 258432     | 0.87%        | 0.282%     |
| 16     | 33.743   | 5834       | 5852     | 5882      | VV 3  | 40600       | 1597246    | 5.35%        | 1.744%     |
| 17     | 33.967   | 5882       | 5894     | 5922      | VV 2  | 13237       | 559799     | 1.88%        | 0.611%     |
| 18     | 34.197   | 5922       | 5937     | 5951      | VV 4  | 12968       | 505467     | 1.69%        | 0.552%     |
| 19     | 34.384   | 5951       | 5972     | 5989      | VV 5  | 12675       | 1093597    | 3.67%        | 1.194%     |
| 20     | 34.624   | 5989       | 6017     | 6086      | VV 4  | 51366       | 3559241    | 11.93%       | 3.887%     |
| 21     | 35.083   | 6086       | 6103     | 6116      | VV 8  | 5639        | 238631     | 0.80%        | 0.261%     |
| 22     | 35.281   | 6116       | 6140     | 6157      | VV 6  | 4587        | 316113     | 1.06%        | 0.345%     |
| 23     | 35.447   | 6157       | 6171     | 6199      | VV 10 | 3026        | 233141     | 0.78%        | 0.255%     |
| 24     | 35.965   | 6249       | 6268     | 6310      | VV 7  | 4412        | 302606     | 1.01%        | 0.330%     |
| 25     | 36.264   | 6310       | 6324     | 6350      | VV 7  | 1808        | 185564     | 0.62%        | 0.203%     |
| 26     | 36.558   | 6369       | 6379     | 6420      | VV 5  | 3040        | 218089     | 0.73%        | 0.238%     |
| 27     | 36.862   | 6420       | 6436     | 6470      | VV 6  | 5501        | 318657     | 1.07%        | 0.348%     |
| 28     | 37.130   | 6470       | 6486     | 6507      | VV 10 | 5141        | 219740     | 0.74%        | 0.240%     |
| 29     | 37.664   | 6565       | 6586     | 6604      | VV 2  | 70634       | 2069365    | 6.94%        | 2.260%     |
| 30     | 37.835   | 6604       | 6618     | 6657      | VV 3  | 33661       | 1816557    | 6.09%        | 1.984%     |
| 31     | 38.112   | 6657       | 6670     | 6703      | VV 3  | 3235        | 349993     | 1.17%        | 0.382%     |
| 32     | 38.428   | 6703       | 6729     | 6740      | VV    | 17925       | 704493     | 2.36%        | 0.769%     |

|    |        |      |      |      |      |         |          |         |         |       |        |
|----|--------|------|------|------|------|---------|----------|---------|---------|-------|--------|
| 33 | 38.567 | 6740 | 6755 | 6787 | VV 4 | 9269    | 413312   | 1.39%   | 0.451%  |       |        |
| 34 | 38.983 | 6819 | 6833 | 6844 | VV 9 | 5112    | 184600   | 0.62%   | 0.202%  |       |        |
| 35 | 39.101 | 6844 | 6855 | 6904 | VV 9 | 7385    | 468842   | 1.57%   | 0.512%  |       |        |
| 36 | 39.550 | 6929 | 6939 | 6965 | VV 6 | 13514   | 595518   | 2.00%   | 0.650%  |       |        |
| 37 | 39.779 | 6965 | 6982 | 7007 | VV   | 265525  | 7613305  | 25.52%  | 8.314%  |       |        |
| 38 | 39.966 | 7007 | 7017 | 7045 | VV   | 2664    | 198700   | 0.67%   | 0.217%  |       |        |
| 39 | 40.169 | 7045 | 7055 | 7082 | VV   | 3893    | 280936   | 0.94%   | 0.307%  |       |        |
| 40 | 40.479 | 7082 | 7113 | 7147 | VV   | 2440    | 361230   | 1.21%   | 0.394%  |       |        |
| 41 | 40.805 | 7147 | 7174 | 7190 | VV   | 69550   | 2060894  | 6.91%   | 2.251%  |       |        |
| 42 | 41.067 | 7209 | 7223 | 7266 | VV 9 | 5435    | 377210   | 1.26%   | 0.412%  |       |        |
| 43 | 41.451 | 7266 | 7295 | 7322 | VV 2 | 48329   | 1352206  | 4.53%   | 1.477%  |       |        |
| 44 | 42.312 | 7405 | 7456 | 7478 | VV 2 | 4162    | 450795   | 1.51%   | 0.492%  |       |        |
| 45 | 42.514 | 7478 | 7494 | 7545 | VV 7 | 29234   | 2515156  | 8.43%   | 2.747%  |       |        |
| 46 | 42.830 | 7545 | 7553 | 7565 | VV 3 | 4169    | 227846   | 0.76%   | 0.249%  |       |        |
| 47 | 42.969 | 7565 | 7579 | 7632 | VV 3 | 4473    | 516241   | 1.73%   | 0.564%  |       |        |
| 48 | 43.369 | 7632 | 7654 | 7701 | VV 3 | 2614    | 341087   | 1.14%   | 0.372%  |       |        |
| 49 | 43.700 | 7701 | 7716 | 7735 | VV 9 | 5048    | 245518   | 0.82%   | 0.268%  |       |        |
| 50 | 43.898 | 7735 | 7753 | 7768 | VV 5 | 6341    | 377580   | 1.27%   | 0.412%  |       |        |
| 51 | 44.101 | 7768 | 7791 | 7841 | VV 5 | 5443    | 784710   | 2.63%   | 0.857%  |       |        |
| 52 | 44.432 | 7841 | 7853 | 7867 | VV 4 | 8003    | 266500   | 0.89%   | 0.291%  |       |        |
| 53 | 44.748 | 7898 | 7912 | 7955 | VV 4 | 2567    | 212984   | 0.71%   | 0.233%  |       |        |
| 54 | 45.079 | 7955 | 7974 | 8006 | VV 4 | 2357    | 183929   | 0.62%   | 0.201%  |       |        |
| 55 | 45.298 | 8006 | 8015 | 8101 | PB 4 | 2101    | 218808   | 0.73%   | 0.239%  |       |        |
| 56 | 46.083 | 8144 | 8162 | 8176 | PV 6 | 6691    | 225336   | 0.76%   | 0.246%  |       |        |
| 57 | 46.863 | 8285 | 8308 | 8335 | VV 3 | 11761   | 570823   | 1.91%   | 0.623%  |       |        |
| 58 | 47.061 | 8335 | 8345 | 8363 | VV 4 | 8329    | 336174   | 1.13%   | 0.367%  |       |        |
| 59 | 47.248 | 8363 | 8380 | 8418 | VV 4 | 1936    | 194372   | 0.65%   | 0.212%  |       |        |
| 60 | 47.664 | 8439 | 8458 | 8466 | VV 5 | 8326    | 277768   | 0.93%   | 0.303%  |       |        |
| 61 | 47.803 | 8466 | 8484 | 8507 | VV 5 | 7377    | 435318   | 1.46%   | 0.475%  |       |        |
| 62 | 48.487 | 8589 | 8612 | 8698 | VV   | 1023841 | 29831765 | 100.00% | 32.577% |       |        |
| 63 | 49.192 | 8734 | 8744 | 8799 | VV 9 | 6981    | 309395   | 1.04%   | 0.338%  |       |        |
| 64 | 49.727 | 8799 | 8844 | 8893 | PV 9 | 1442    | 218794   | 0.73%   | 0.239%  |       |        |
| 65 | 50.068 | 8893 | 8908 | 8939 | VV 7 | 8038    | 397648   | 1.33%   | 0.434%  |       |        |
| 66 | 50.378 | 8939 | 8966 | 9004 | VV 7 | 1721    | 202117   | 0.68%   | 0.221%  |       |        |
| 67 | 50.667 | 9004 | 9020 | 9071 | VV 7 | 6083    | 359597   | 1.21%   | 0.393%  |       |        |
| 68 | 51.206 | 9071 | 9121 | 9143 | PV 7 | 2528    | 374221   | 1.25%   | 0.409%  |       |        |
| 69 | 51.377 | 9143 | 9153 | 9174 | VV 7 | 9029    | 375074   | 1.26%   | 0.410%  |       |        |
| 70 | 51.618 | 9174 | 9198 | 9231 | VV 7 | 2491    | 286758   | 0.96%   | 0.313%  |       |        |
| 71 | 52.082 | 9231 | 9285 | 9309 | VV 7 | 5752    | 460562   | 1.54%   | 0.503%  |       |        |
| 72 | 52.339 | 9309 | 9333 | 9345 | VV 7 | 2597    | 182723   | 0.61%   | 0.200%  |       |        |
| 73 | 52.574 | 9345 | 9377 | 9411 | VV 7 | 4319    | 506750   | 1.70%   | 0.553%  |       |        |
| 74 | 53.039 | 9411 | 9464 | 9501 | VV 7 | 2326    | 542450   | 1.82%   | 0.592%  |       |        |
| 75 | 53.333 | 9501 | 9519 | 9532 | VV 7 | 3093    | 216305   | 0.73%   | 0.236%  |       |        |
| 76 | 53.466 | 9532 | 9544 | 9577 | VV 7 | 5212    | 396551   | 1.33%   | 0.433%  |       |        |
| 77 | 53.888 | 9597 | 9623 | 9639 | VV 7 | 2676    | 257820   | 0.86%   | 0.282%  |       |        |
| 78 | 54.203 | 9673 | 9682 | 9731 | VV 7 | 1535    | 231316   | 0.78%   | 0.253%  |       |        |
| 79 | 54.502 | 9731 | 9738 | 9794 | VV 7 |         | 1491     |         | 173417  | 0.58% | 0.189% |



## S2.3: MS spectra of identified compound and the comparison of the MS spectra of its standard products

### 1. Comparison of Mass Spectra of 2-Pyrrolidinone and Its Standards

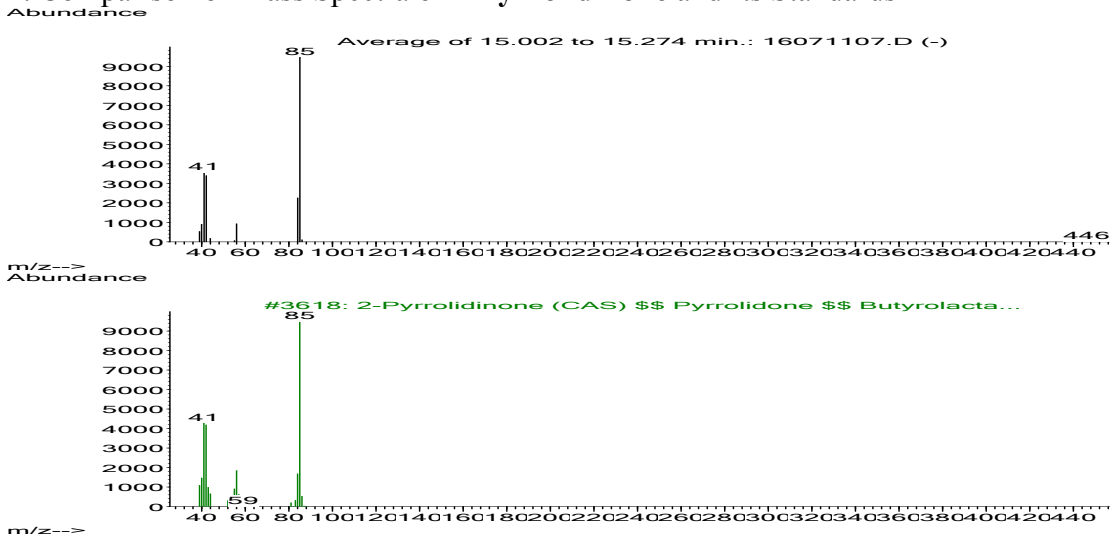

### 2. Comparison of Mass Spectra of 2-Piperidinone and Its Standards

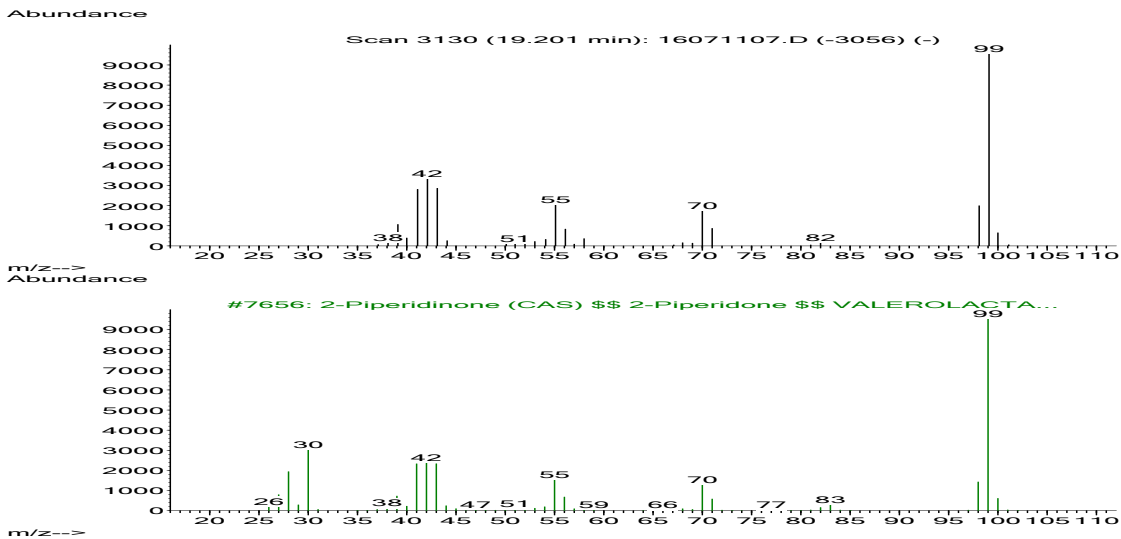

### 3. Mass Spectra of Cyclo (Gly-Gly) Dipeptide

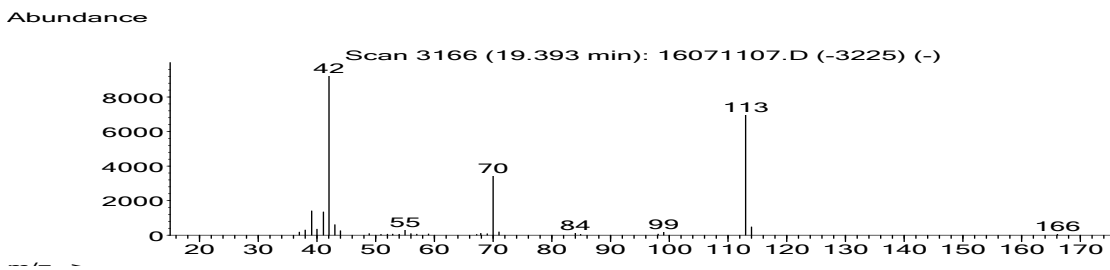

#### 4. Comparison of Mass Spectra of 1,3-Isobenzofurandione and Its Standards

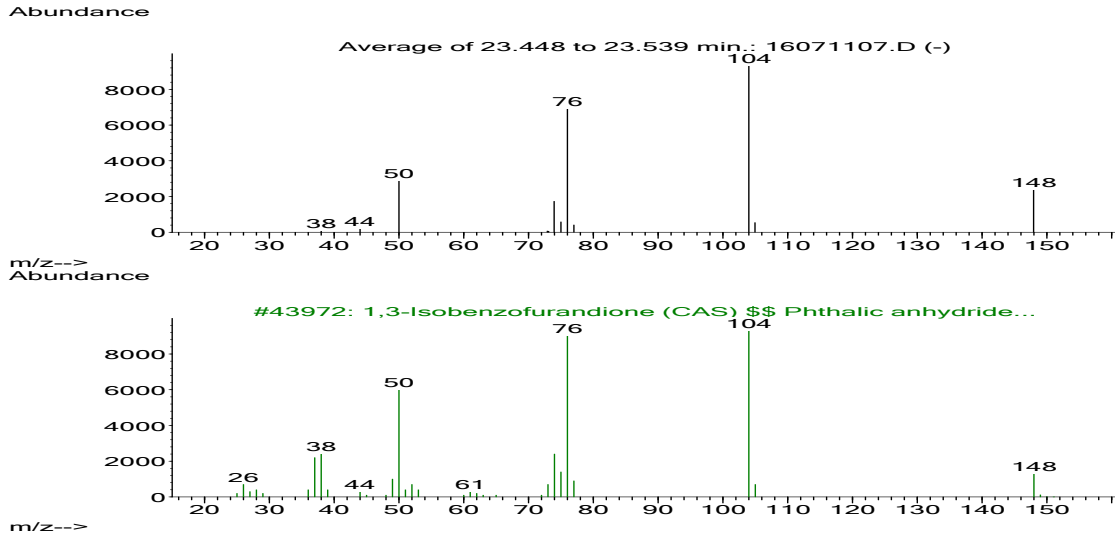

#### 5. Comparison of Mass Spectra of Benzenepropanoic Acid and Its Standards

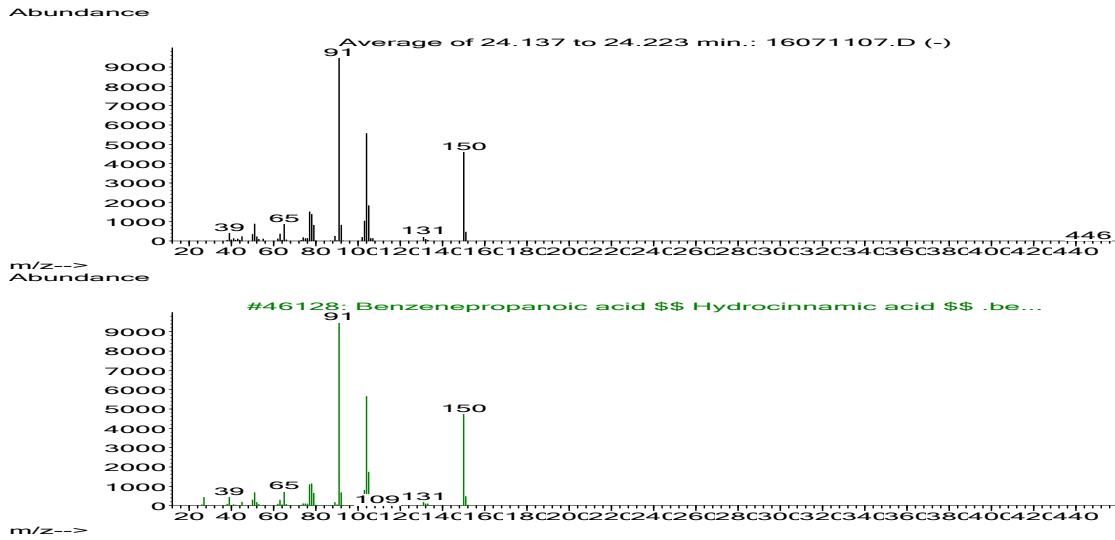

#### 6. Mass Spectra of Cyclo (Gly-L-Pro) Dipptide

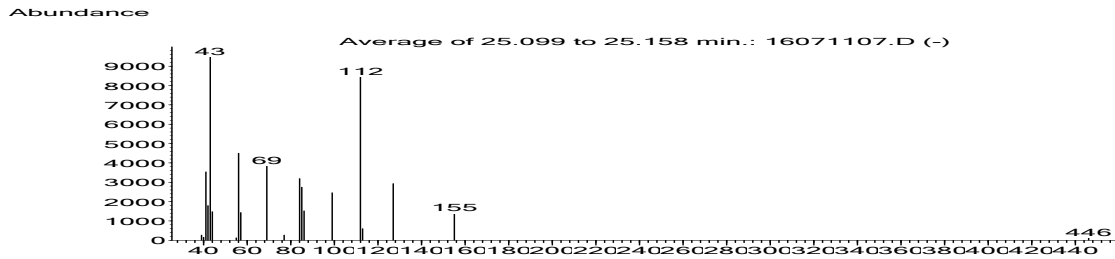

## 7. Mass Spectra of Cyclo (Gly-L-Ala) Dipeptide

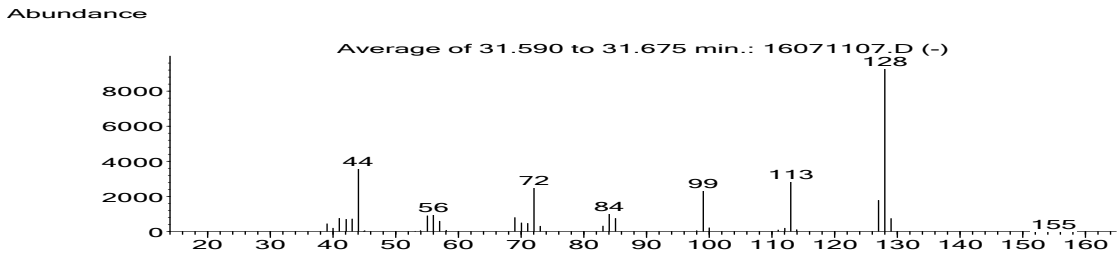

## 8. Mass Spectra of Cyclo (L-Ala-L-Pro) Dipeptide

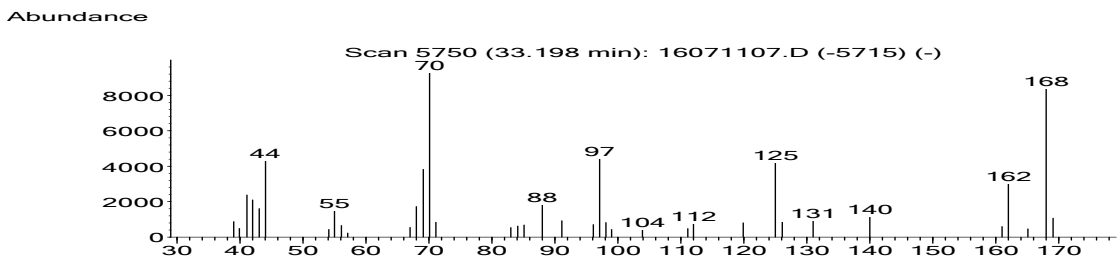

## 9. Comparison of Mass Spectra of 5-Hydroxy-5,6,7,8-Tetrahydroquinoxaline and Its Standards

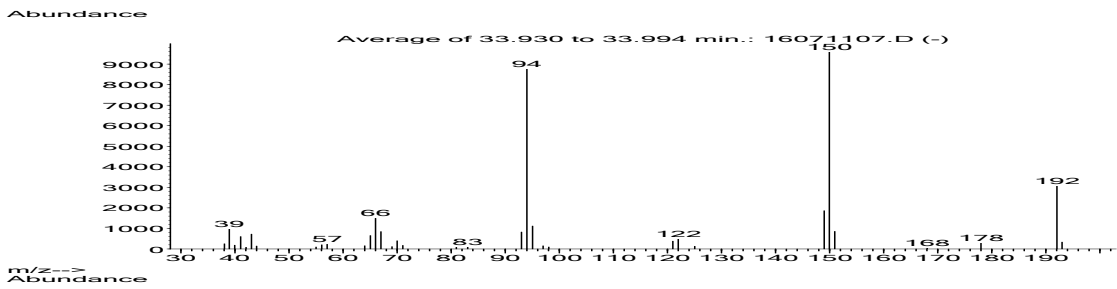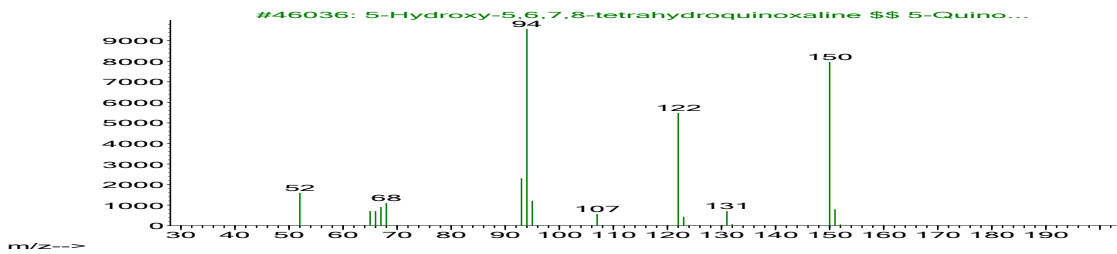

## 10. Comparison of Mass Spectra of Cyclo (L-Gly-L-Leu) Dipeptide and Its Standards

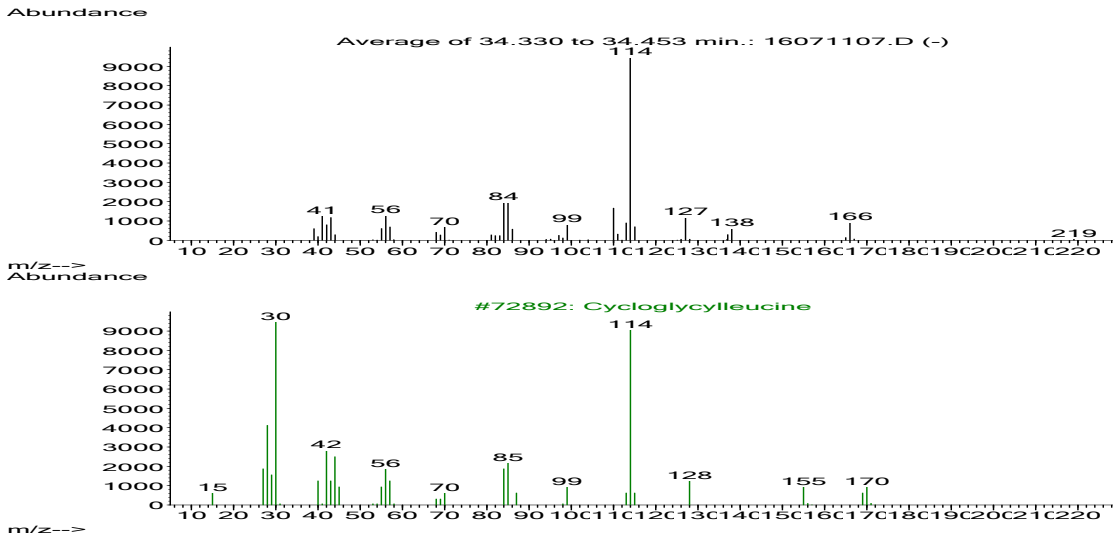

## 11 Comparison of Mass Spectra of hexadecanoic acid, methyl ester and Its Standards

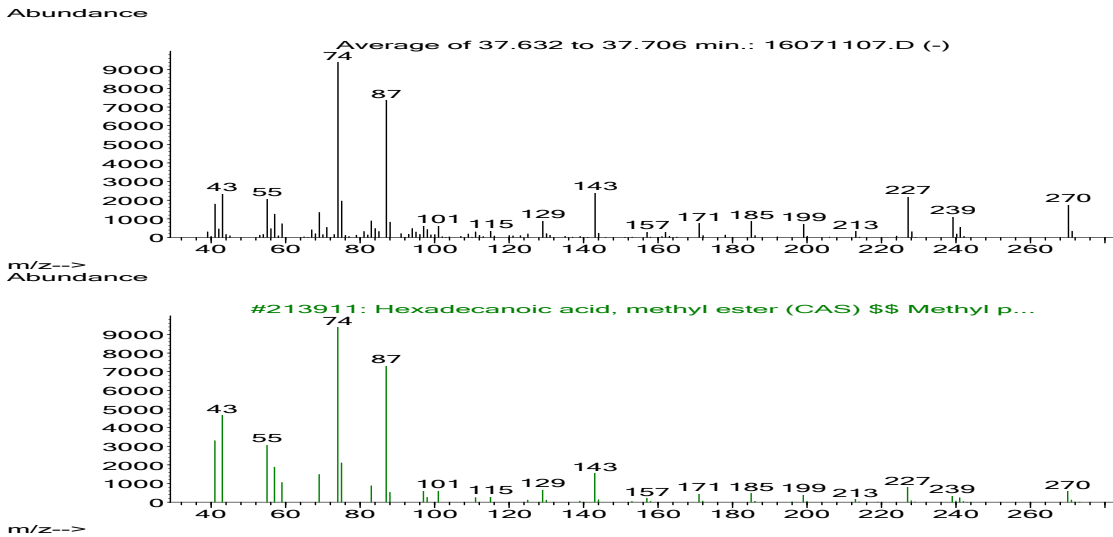

## 12 Comparison of Mass Spectra of Cyclo (L-Pro-L-Pro) Dipeptide and Its Standards

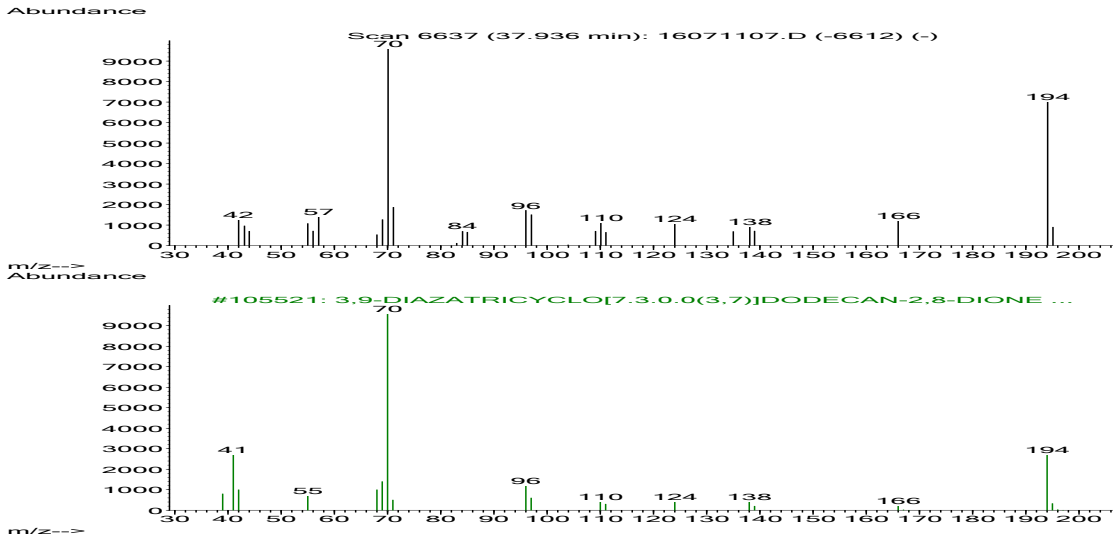

## 13. Mass Spectra of Cyclo (L-Val-L-His) Dipeptide

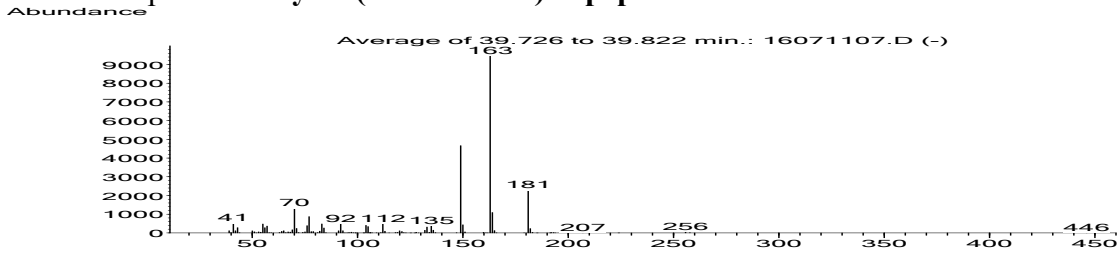

## 14. Comparison of Mass Spectra of 3-(o-azidophenyl) Propanol and Its Standards

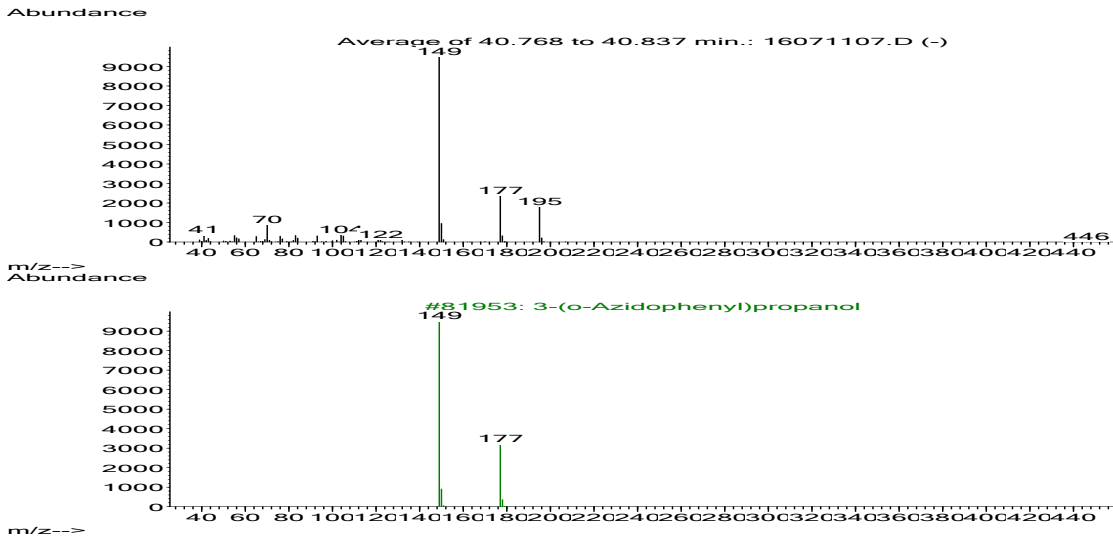

### 15. Comparison of Mass Spectra of **Octadecanoic Acid, Methyl Ester** and Its Standards

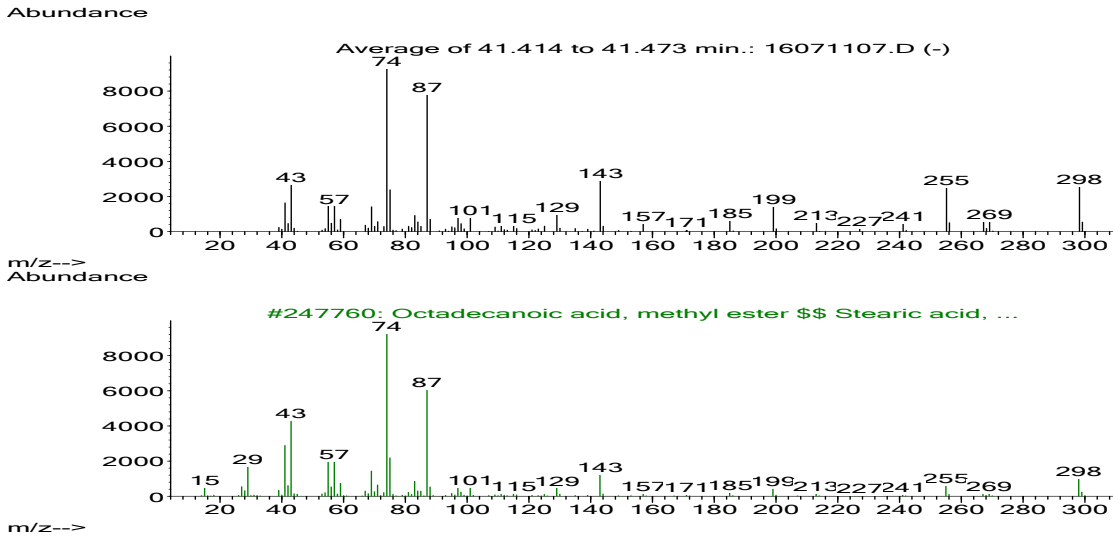

### 16. Comparison of Mass Spectra of **Cyclo (L-Pro-oh-L-Pro) Dipeptide** and Its Standards

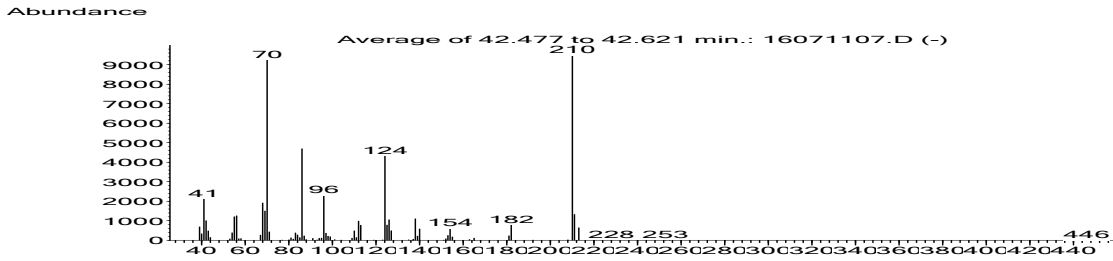

**Figure S3.** GC-MS chromatogram of acetone extraction part (PO100) of the crude extract of W1, including **S3.1:** total ion chromatograph (TIC), **S3.2:** area percent report, and **S3.3:** MS spectra of identified compound and the comparison of the MS spectra of its standard products.

**S3.1:** Total Ion Chromatograph (TIC)

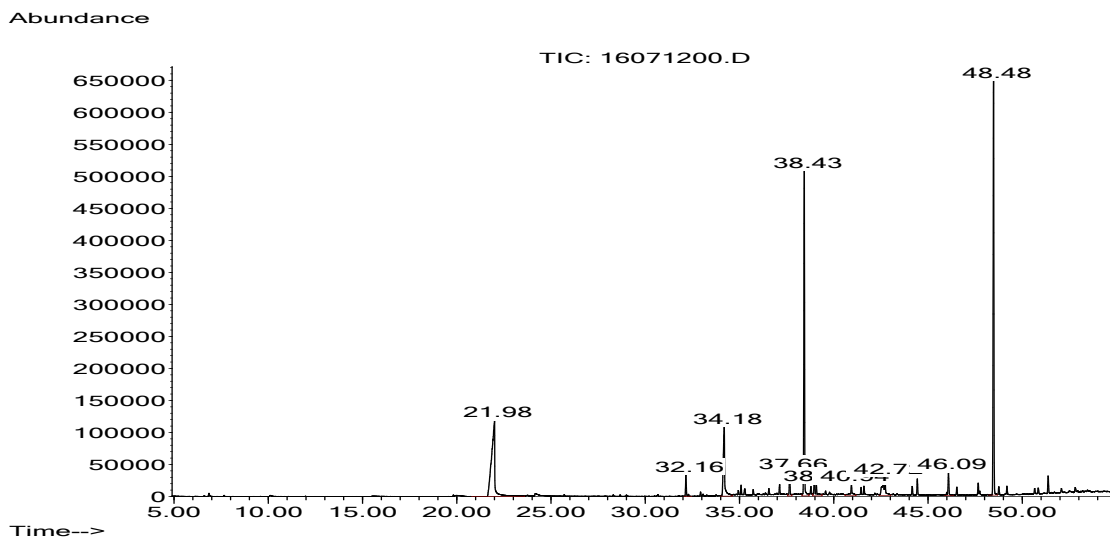

### S3.2: Area Percent Report

Data File : C:\MSDCHEM\1\DATA\16071200.D Vial: 1  
 Acq On : 12 Jul 2016 10:26 Operator:  
 Sample : P0100 Inst : GCMS  
 Misc : Multiplr: 1.00  
 Sample Amount: 0.00

MS Integration Params: autoint1.e

Method : C:\MSDCHEM\1\METHODS\D-DDVP.M (Chemstation Integrator)  
 Title :

Signal : TIC

| peak # | R.T. min | first scan | max scan | last scan | PK TY | peak height | corr. area | corr. % max. | % of total |
|--------|----------|------------|----------|-----------|-------|-------------|------------|--------------|------------|
| 1      | 21.995   | 3560       | 3653     | 3796      | BV 2  | 114203      | 14266994   | 77.98%       | 19.377%    |
| 2      | 24.180   | 4031       | 4062     | 4163      | BV 6  | 3823        | 499544     | 2.73%        | 0.678%     |
| 3      | 32.156   | 5537       | 5555     | 5574      | VV    | 33545       | 940478     | 5.14%        | 1.277%     |
| 4      | 34.186   | 5901       | 5935     | 5982      | VV 2  | 107963      | 5850488    | 31.98%       | 7.946%     |
| 5      | 34.939   | 6067       | 6076     | 6092      | VV 5  | 8494        | 347545     | 1.90%        | 0.472%     |
| 6      | 35.084   | 6092       | 6103     | 6116      | VV 2  | 16965       | 529439     | 2.89%        | 0.719%     |
| 7      | 35.281   | 6129       | 6140     | 6157      | VV 6  | 11084       | 506398     | 2.77%        | 0.688%     |
| 8      | 35.725   | 6213       | 6223     | 6233      | VV 2  | 10286       | 326280     | 1.78%        | 0.443%     |
| 9      | 36.376   | 6333       | 6345     | 6366      | VV 2  | 4472        | 311992     | 1.71%        | 0.424%     |
| 10     | 36.558   | 6366       | 6379     | 6401      | VV    | 11748       | 485223     | 2.65%        | 0.659%     |
| 11     | 36.873   | 6401       | 6438     | 6444      | VV    | 3168        | 328640     | 1.80%        | 0.446%     |
| 12     | 36.985   | 6444       | 6459     | 6474      | VV    | 4365        | 310102     | 1.70%        | 0.421%     |
| 13     | 37.130   | 6474       | 6486     | 6497      | VV 3  | 17868       | 575880     | 3.15%        | 0.782%     |
| 14     | 37.658   | 6572       | 6585     | 6607      | VV 3  | 37274       | 1189972    | 6.50%        | 1.616%     |
| 15     | 37.974   | 6622       | 6644     | 6665      | VV 3  | 3550        | 395756     | 2.16%        | 0.538%     |
| 16     | 38.433   | 6710       | 6730     | 6777      | VV    | 510972      | 14290056   | 78.11%       | 19.408%    |
| 17     | 38.791   | 6777       | 6797     | 6817      | VV 4  | 14824       | 681525     | 3.73%        | 0.926%     |
| 18     | 38.967   | 6817       | 6830     | 6841      | VV 7  | 18210       | 761190     | 4.16%        | 1.034%     |
| 19     | 39.074   | 6841       | 6850     | 6861      | VV 3  | 17815       | 547577     | 2.99%        | 0.744%     |
| 20     | 39.170   | 6861       | 6868     | 6905      | VV 3  | 3472        | 378837     | 2.07%        | 0.515%     |
| 21     | 39.566   | 6930       | 6942     | 6962      | VV 6  | 7005        | 342230     | 1.87%        | 0.465%     |
| 22     | 39.779   | 6962       | 6982     | 6995      | VV 4  | 5506        | 317032     | 1.73%        | 0.431%     |
| 23     | 40.939   | 7138       | 7199     | 7244      | VV 3  | 16979       | 1228089    | 6.71%        | 1.668%     |
| 24     | 41.452   | 7281       | 7295     | 7308      | VV 4  | 12916       | 422474     | 2.31%        | 0.574%     |
| 25     | 41.601   | 7308       | 7323     | 7345      | VV 4  | 14986       | 585876     | 3.20%        | 0.796%     |
| 26     | 42.627   | 7476       | 7515     | 7524      | VV 4  | 21251       | 1667650    | 9.12%        | 2.265%     |
| 27     | 42.723   | 7524       | 7533     | 7554      | VV 4  | 28979       | 1050856    | 5.74%        | 1.427%     |
| 28     | 44.165   | 7785       | 7803     | 7825      | VV 5  | 14031       | 455930     | 2.49%        | 0.619%     |
| 29     | 44.432   | 7825       | 7853     | 7893      | VV 3  | 25904       | 813064     | 4.44%        | 1.104%     |
| 30     | 46.089   | 8152       | 8163     | 8188      | VV 5  | 35371       | 1110578    | 6.07%        | 1.508%     |
| 31     | 46.532   | 8233       | 8246     | 8258      | VV 5  | 12995       | 385219     | 2.11%        | 0.523%     |



|    |        |      |      |      |      |        |          |         |         |       |        |
|----|--------|------|------|------|------|--------|----------|---------|---------|-------|--------|
| 32 | 47.665 | 8440 | 8458 | 8467 | VV 4 | 19041  | 567366   | 3.10%   | 0.771%  |       |        |
| 33 | 48.477 | 8594 | 8610 | 8632 | VV   | 648241 | 18294784 | 100.00% | 24.847% |       |        |
| 34 | 48.760 | 8652 | 8663 | 8687 | VV 6 | 13333  | 443997   | 2.43%   | 0.603%  |       |        |
| 35 | 49.187 | 8712 | 8743 | 8762 | VV 4 | 14063  | 533005   | 2.91%   | 0.724%  |       |        |
| 36 | 50.662 | 8999 | 9019 | 9032 | PV 6 | 9143   | 336415   | 1.84%   | 0.457%  |       |        |
| 37 | 50.849 | 9041 | 9054 | 9083 | VV 8 | 9562   | 376691   | 2.06%   | 0.512%  |       |        |
| 38 | 51.372 | 9141 | 9152 | 9167 | VV 2 | 27739  | 837458   | 4.58%   | 1.137%  |       |        |
| 39 | 52.814 | 9407 | 9422 | 9441 | VV 2 |        | 7760     |         | 335887  | 1.84% | 0.456% |

### S3.3: MS Spectra of Identified Compound and the Comparison of the MS Spectra of Its Standard Products.

#### 1. Comparison of Mass Spectra of 2-Piperidinone and Its Standards

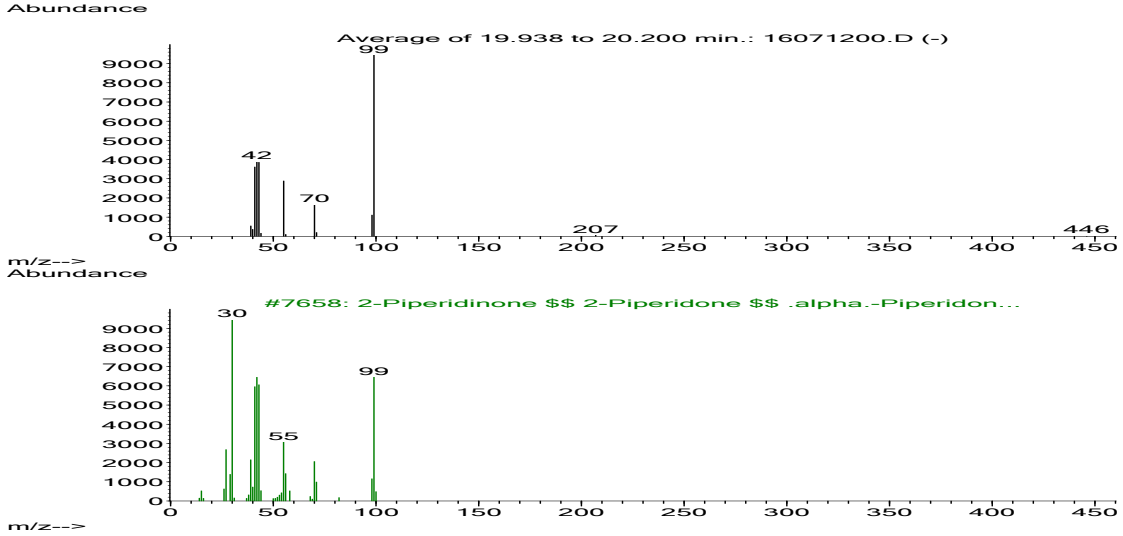

#### 2. Comparison of Mass Spectra of Benzeneacetic Acid and Its Standards

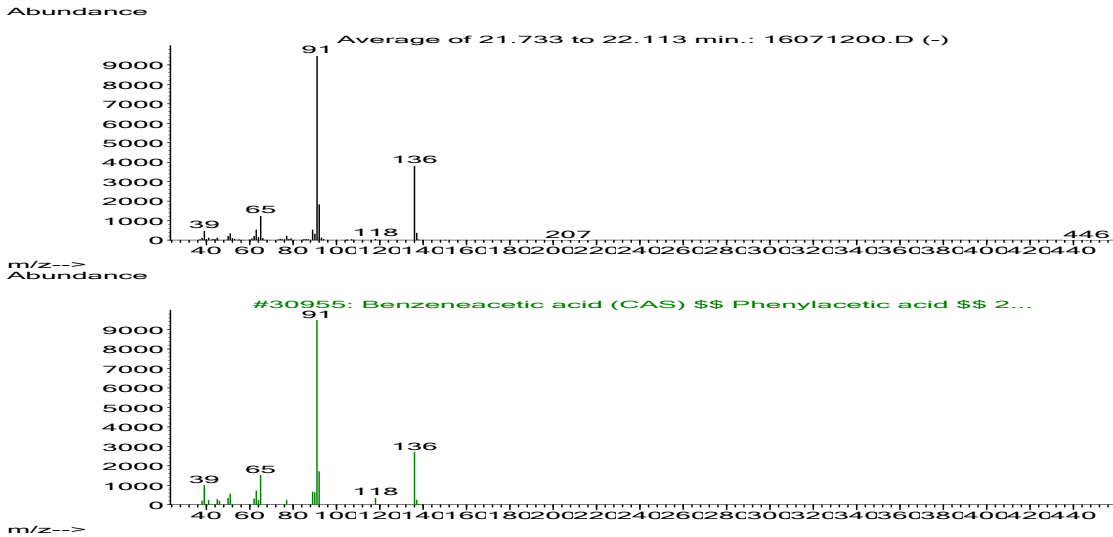

### 3. Comparison of Mass Spectra of Benzenepropanoic Acid and Its Standards

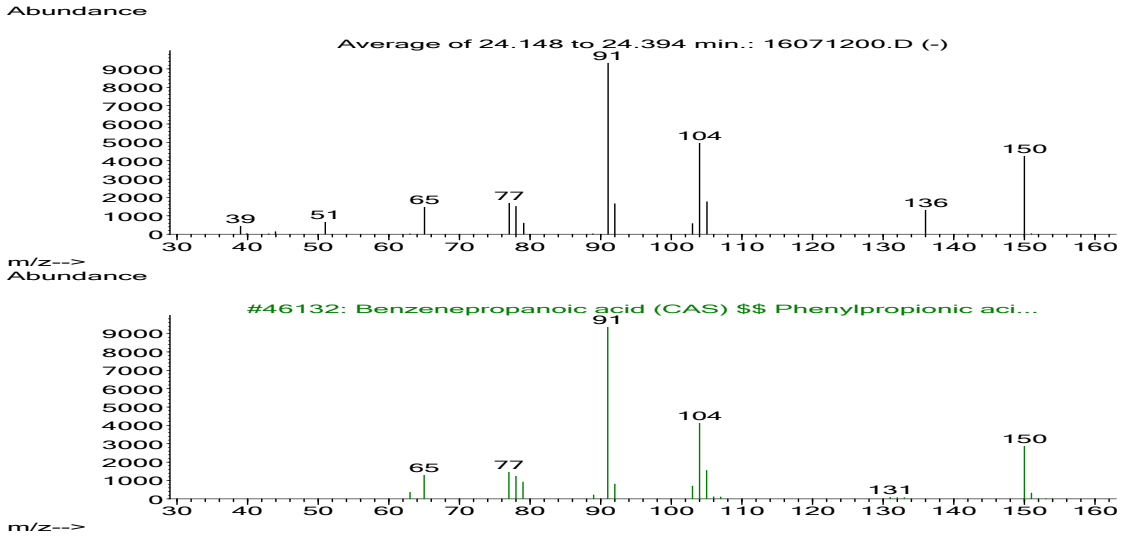

### 4. Comparison of Mass Spectra of Ethyl Citrate and Its Standards

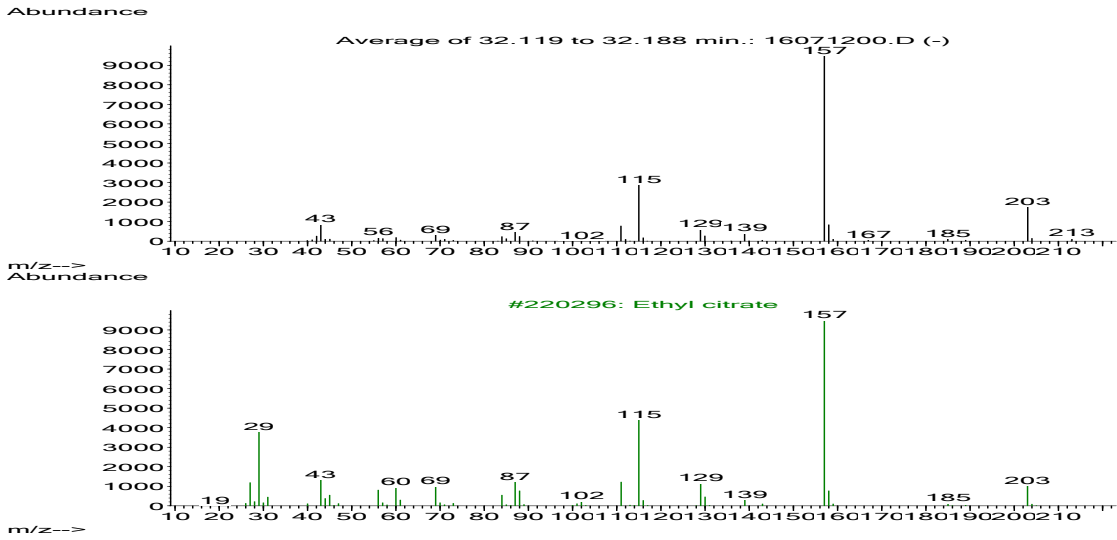

## 5. Comparison of Mass Spectra of Cyclo (Gly-L-Pro) Dipeptide and Its Standards

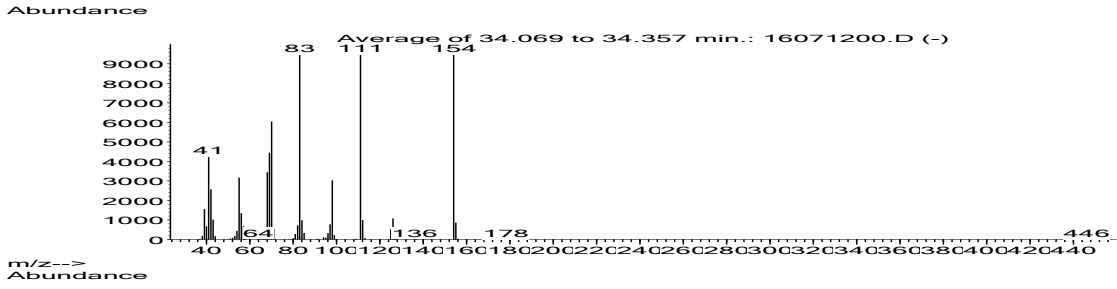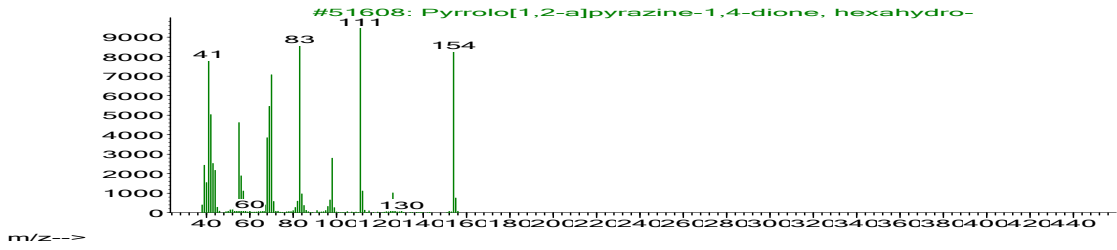

## 6. Comparison of Mass Spectra of 1-Heptadecene and Its Standards

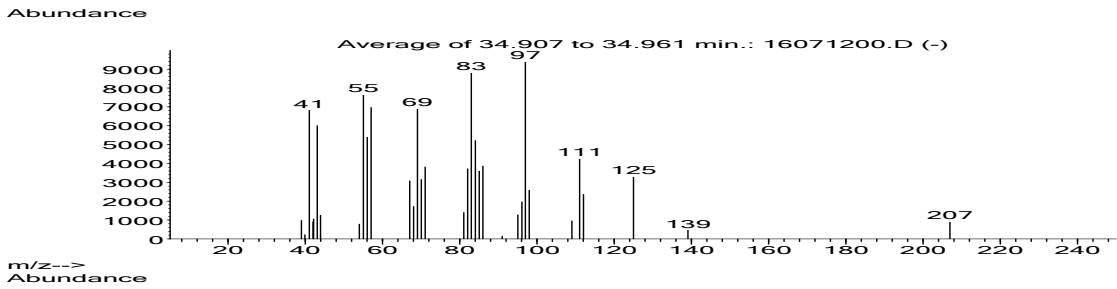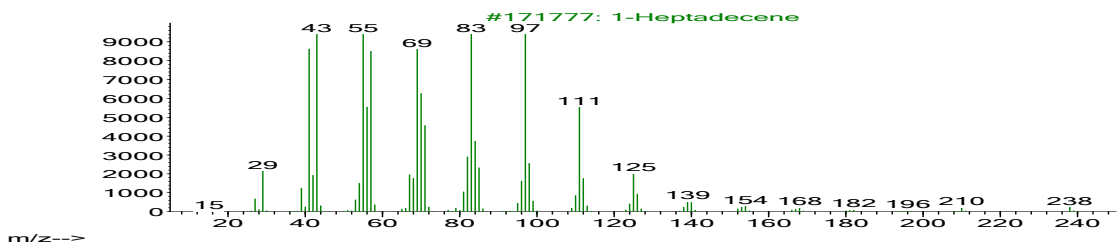

## 7. Comparison of Mass Spectra of **Octadecane** and Its Standards

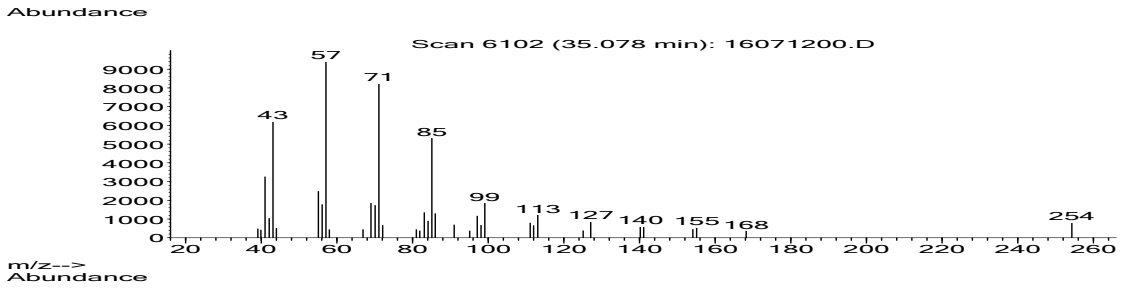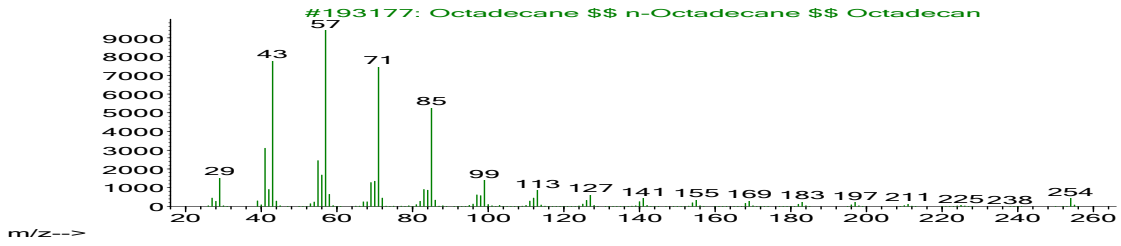

## 8. Comparison of Mass Spectra of **Hexadecane, 2,6,10,14-Tetramethyl-** and Its Standards

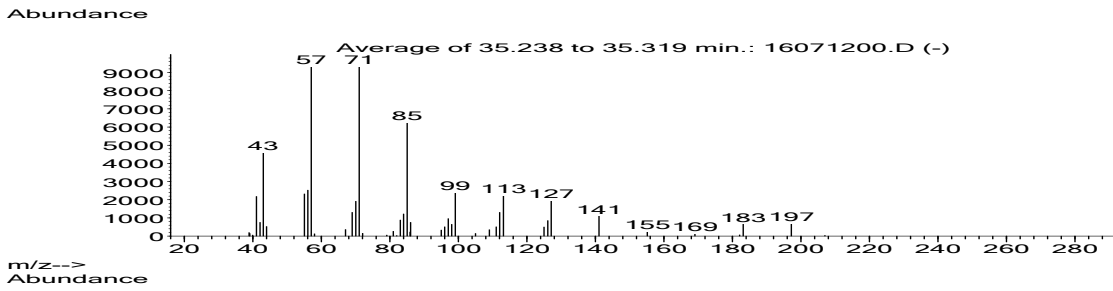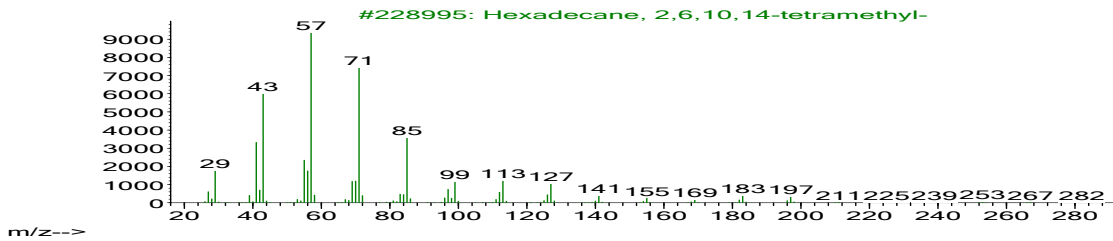

## 9. Comparison of Mass Spectra of **Nonadecane** and Its Standards

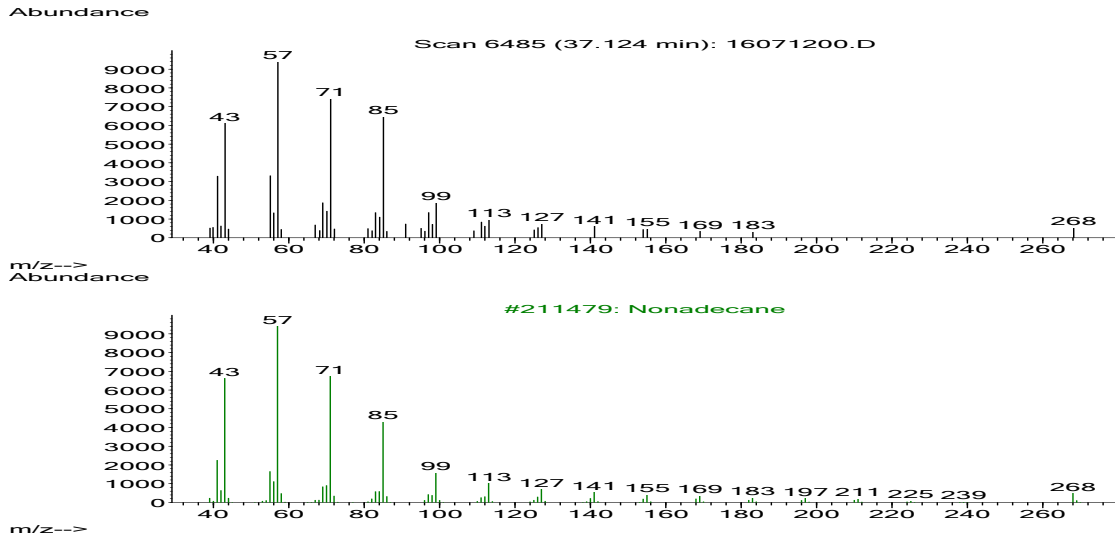

## 10. Comparison of Mass Spectra of **Hexadecanoic Acid, Methyl Ester** and Its Standards

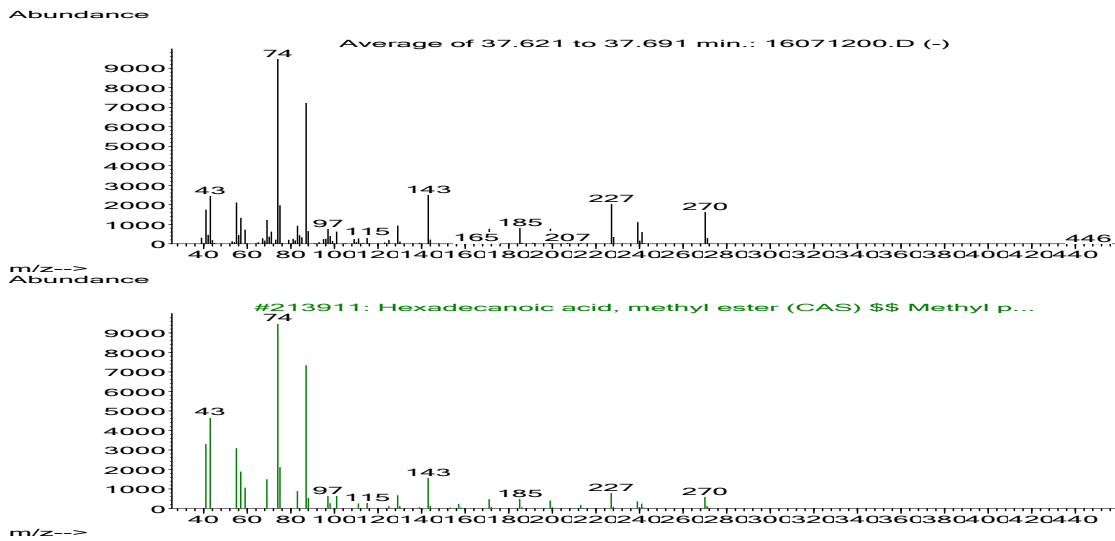

## 11. Comparison of Mass Spectra of **Hexadecanoic Acid, Ethyl Ester** and Its Standards

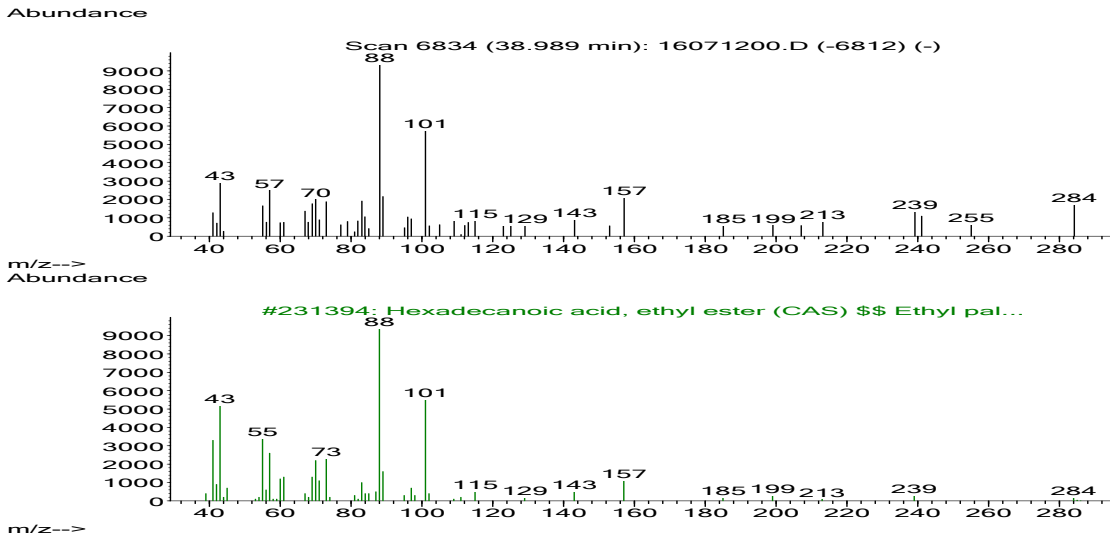

## 12. Comparison of Mass Spectra of **Icosane** and Its Standards

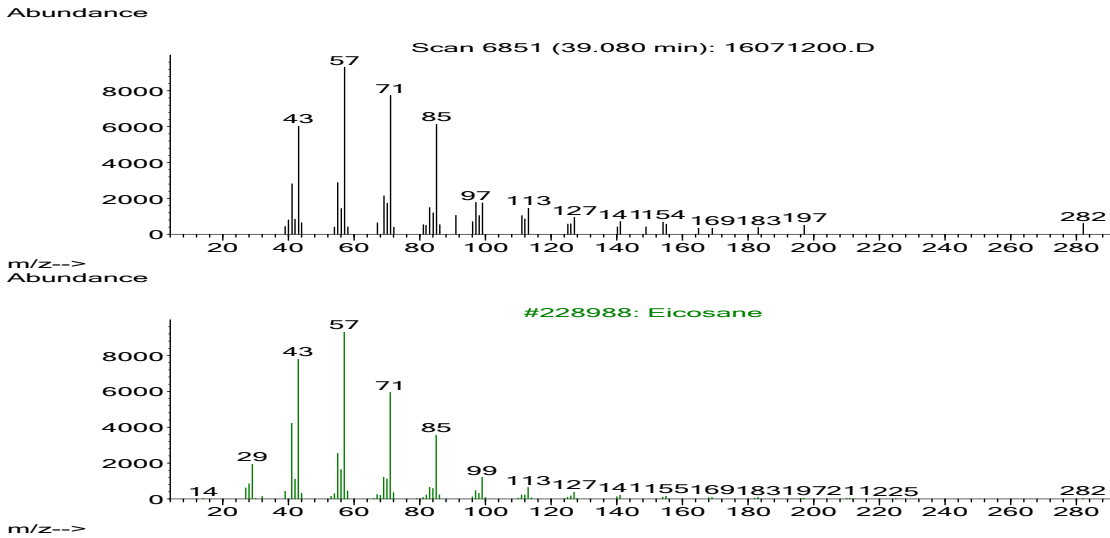

### 13. Comparison of Mass Spectra of Heneicosane and Its Standards

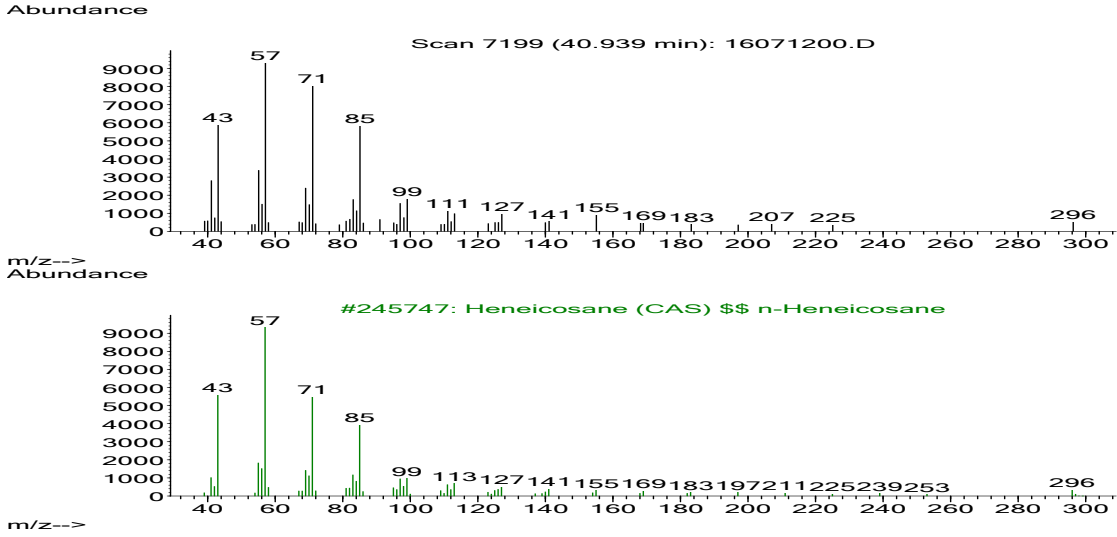

### 14. Comparison of Mass Spectra of Octadecanoic Acid, Methyl Ester and Its Standards

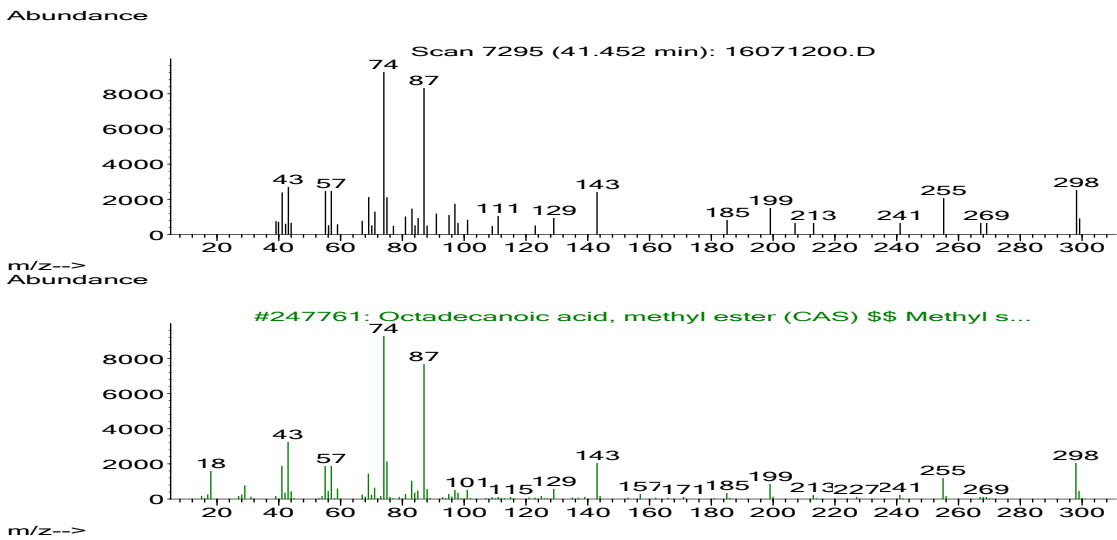

### 15. Mass Spectra of Cyclo (L-Pro-oh-L-Pro) Dipeptide

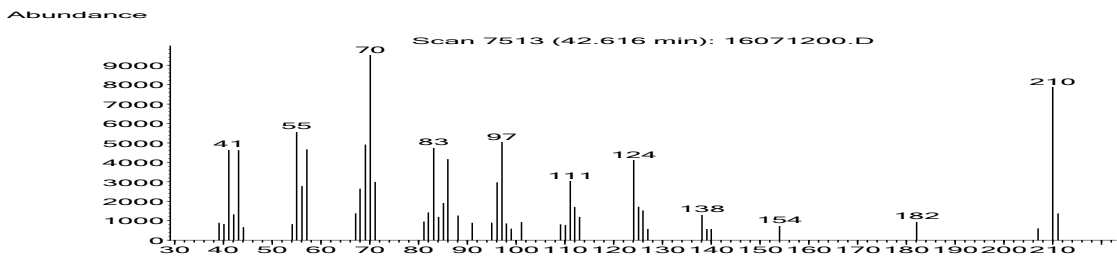



## 16. Comparison of Mass Spectra of **Docosane** and Its Standards

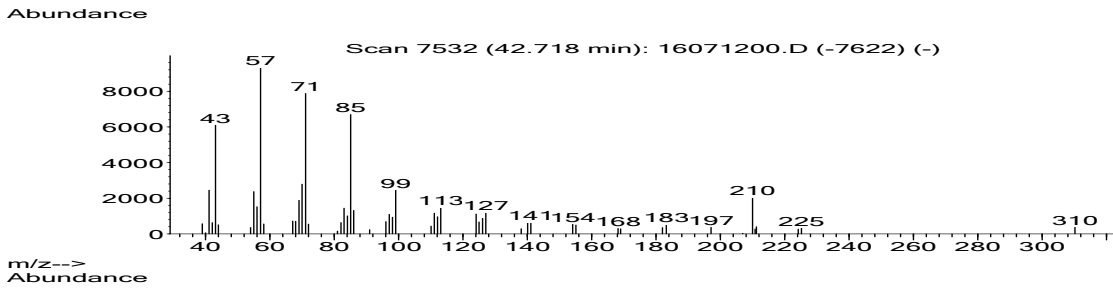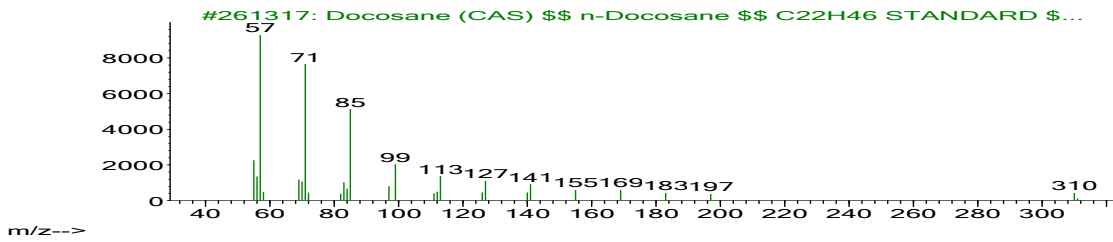

## 17. Comparison of Mass Spectra of **Tricosane** and Its Standards

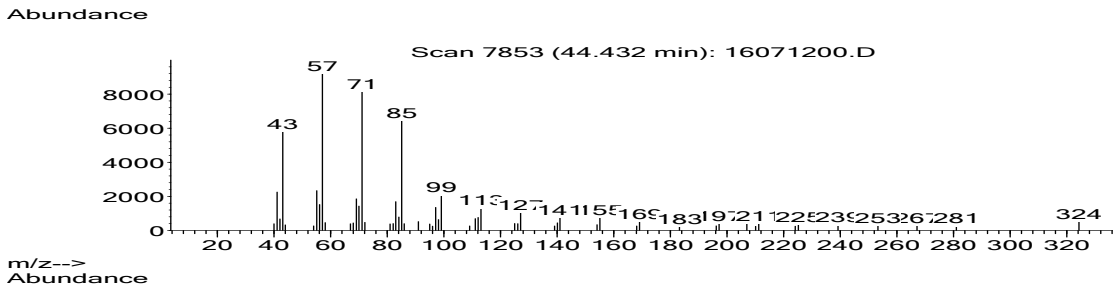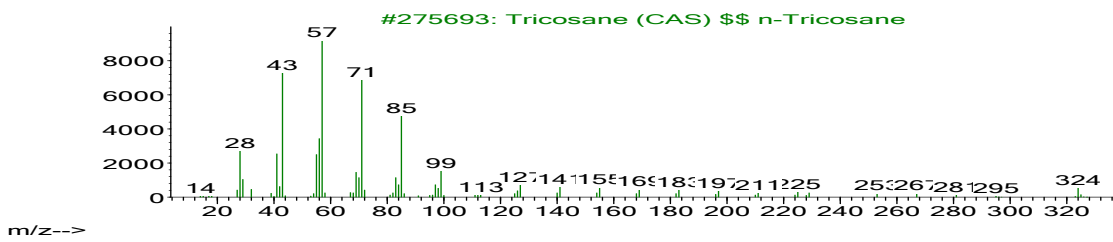

## 18. Comparison of Mass Spectra of **Tetracosane** and Its Standards

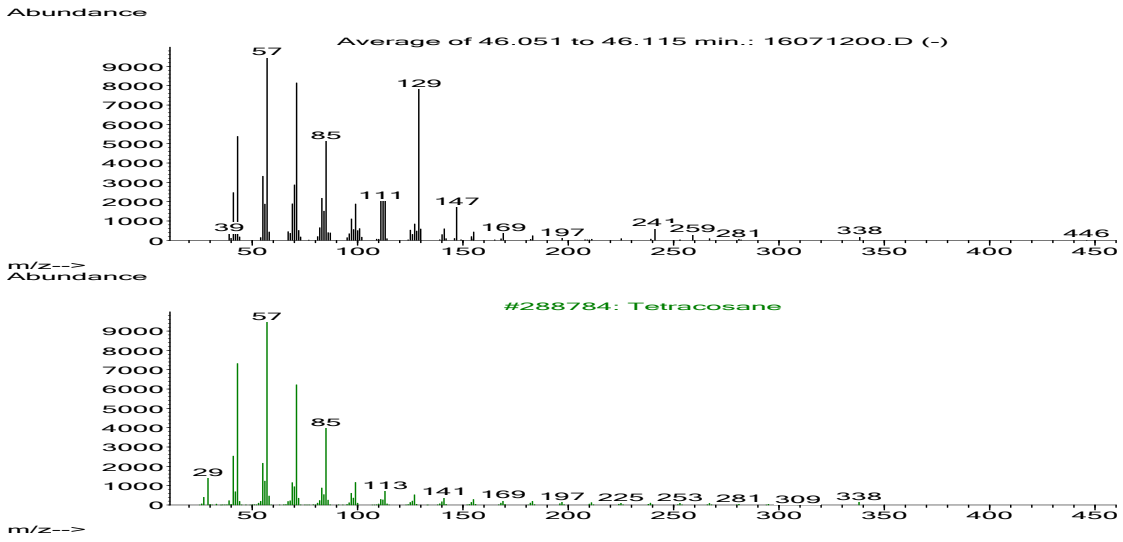

## 19. Comparison of Mass Spectra of **Pentacosane** and Its Standards

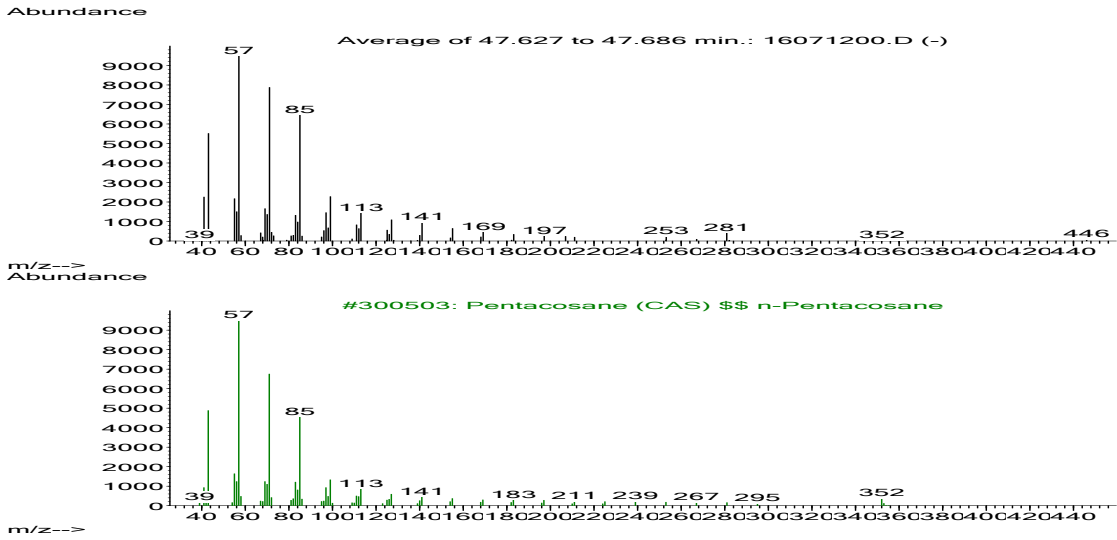

## 20. Comparison of Mass Spectra of Eicosane,7-Hexyl- and Its Standards

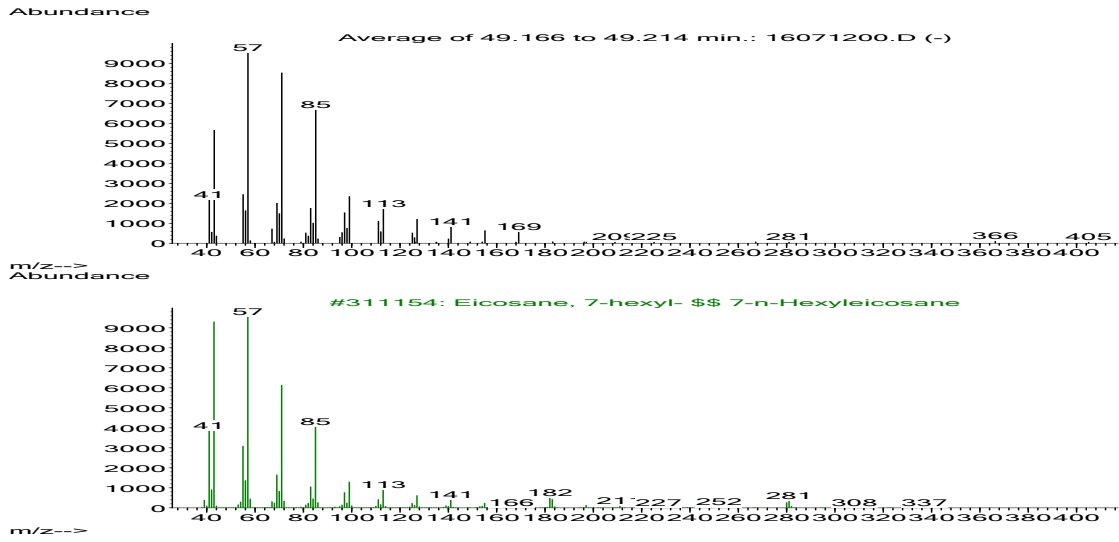

## 21. Comparison of Mass Spectra of Heptacosane and Its Standards

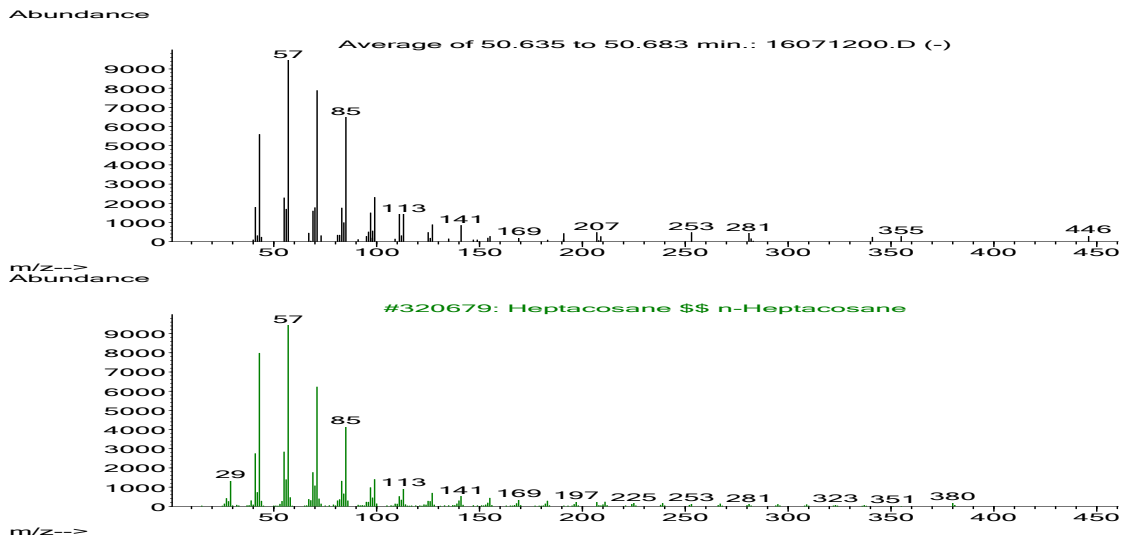

**Figure S4 A:** LC-ESI-MS spectrum and structure of the bacillomycin D C15. **B:** ESI-MS/MS spectrum of the precursor ion  $[M + H]^+$  at  $m/z$  1,045.5501 with fragment ions analysis.

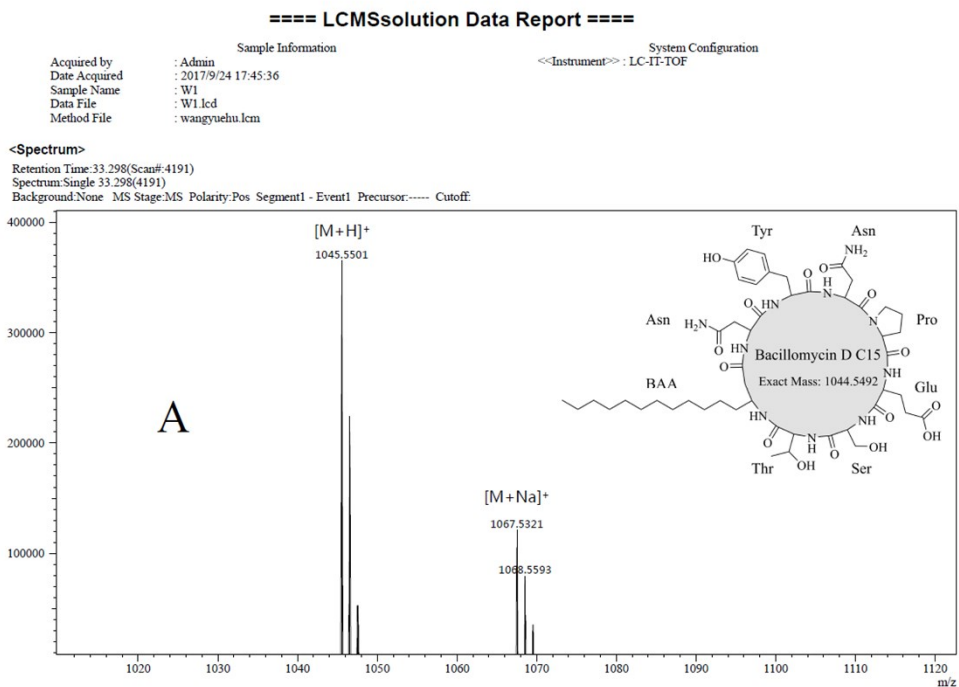

==== LCMSsolution Data Report ====

|                    |                      |                           |
|--------------------|----------------------|---------------------------|
| Sample Information |                      | System Configuration      |
| Acquired by        | : Admin              | <<Instrument>>: LC-IT-TOF |
| Date Acquired      | : 2017/9/24 17:45:36 |                           |
| Sample Name        | : W1                 |                           |
| Data File          | : W1.lcd             |                           |
| Method File        | : wangyuehu.lcm      |                           |

<Spectrum>

Retention Time: 33.298(Scan#:4192)  
 Spectrum: Single 33.298(4192)  
 Background: None MS Stage: MS/MS Polarity: Pos Segment1 - Event2 Precursor: 1045.55 Cutoff: 289

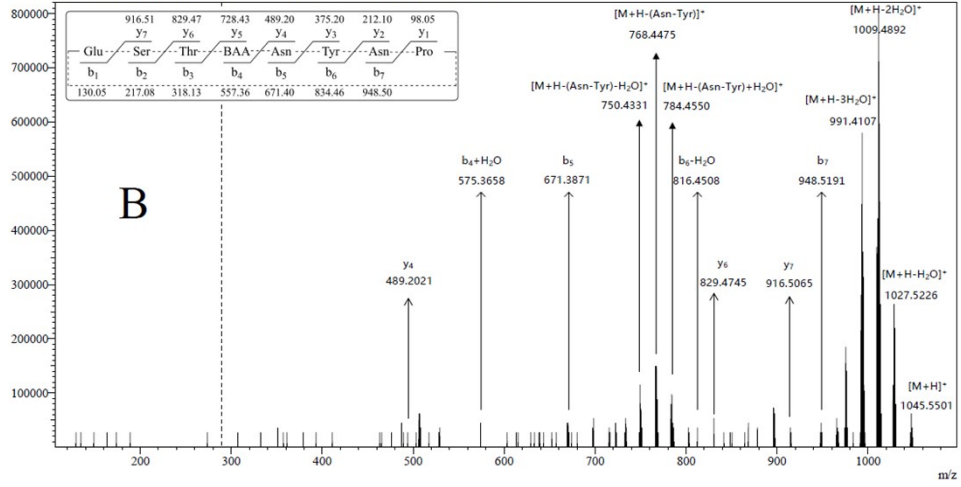

**Figure S5 A:** LC-ESI-MS spectrum and structure of the bacillomycin D C16. **B:** ESI-MS/MS spectrum of the precursor ion  $[M + H]^+$  at  $m/z$  1,059.5629 with fragment ions analysis.

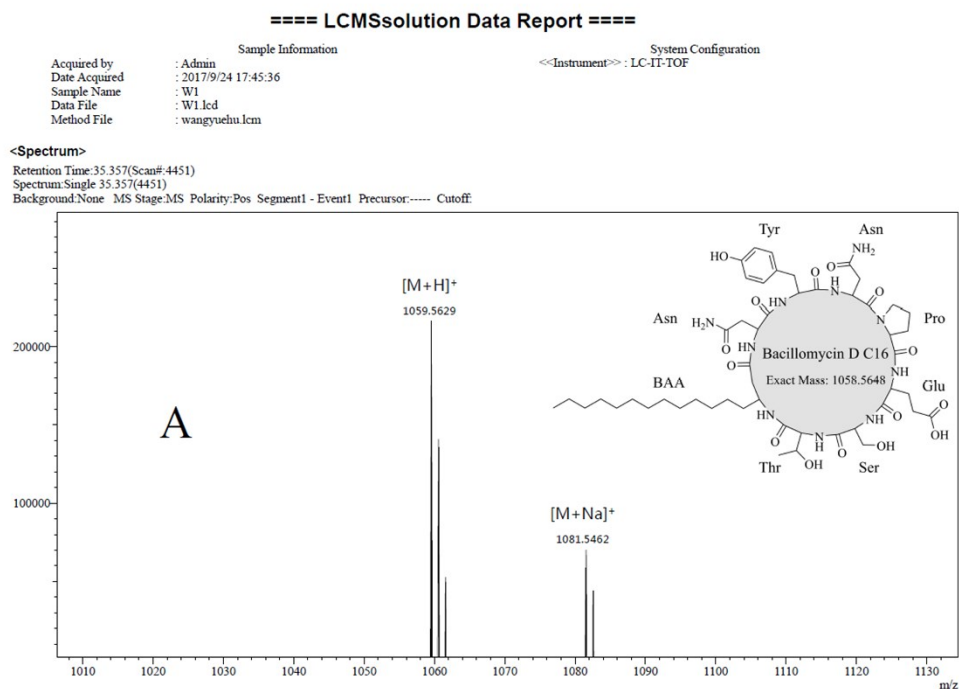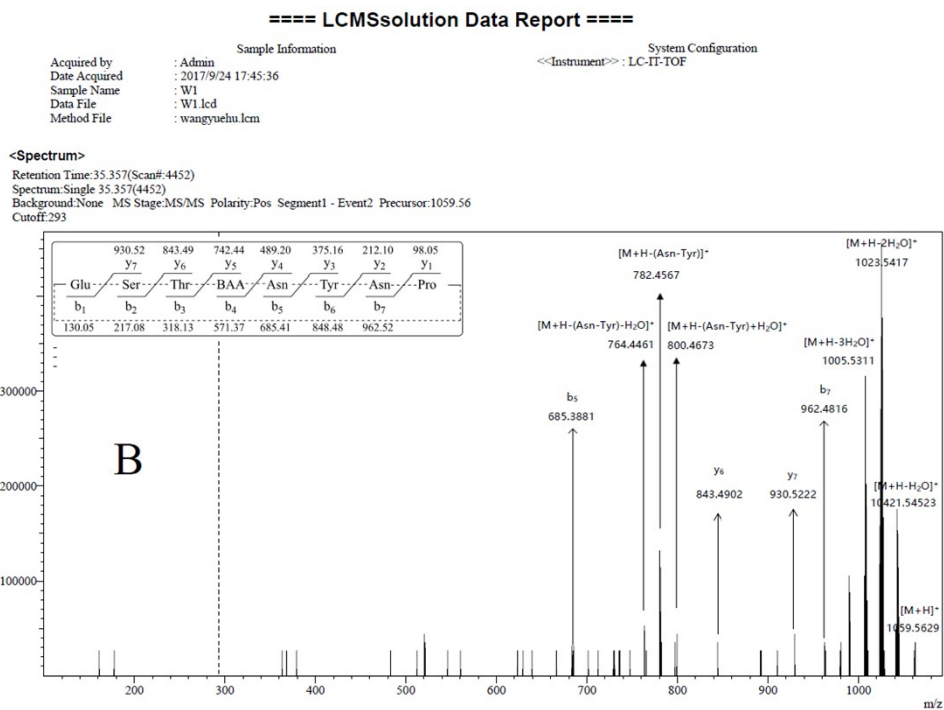

**Figure S6 A:** LC-ESI-MS spectrum and structure of the bacillomycin D C17.

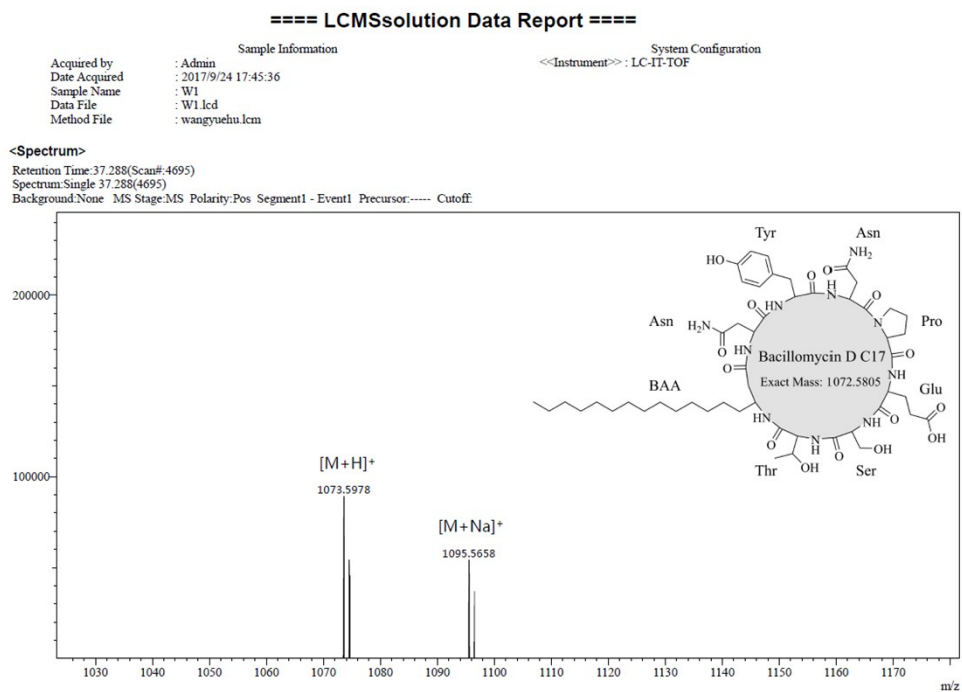

Table S1. Information of Known Acaricidal Compounds

| NO. | Name               | SMILES                                                                                  | Formula                  |
|-----|--------------------|-----------------------------------------------------------------------------------------|--------------------------|
| 1   | Isomate-M          | <chem>CCCC=CCCCCCCCO</chem>                                                             | $C_{26}H_{50}O_3$        |
| 2   | (Z)-11-hexadecenal | <chem>CCCCC=CCCCCCCCCCC=O</chem>                                                        | $C_{16}H_{30}O$          |
| 3   | Wintergreen oil    | <chem>COC(=O)C1=CC=CC=C1O</chem>                                                        | $C_8H_8O_3$              |
| 4   | Eucalyptus oil     | <chem>CC1(C2CCC(O1)(CC2)C)C</chem>                                                      | $C_{10}H_{18}O$          |
| 5   | Cyromazine         | <chem>C1CC1NC2=NC(=NC(=N2)N)N</chem>                                                    | $C_6H_{10}N_6$           |
| 6   | Diethyltoluamide   | <chem>CCN(CC)C(=O)C1=CC=CC(=C1)C</chem>                                                 | $C_4H_{13}N_3$           |
| 7   | Carbofuran         | <chem>CC1(CC2=C(O1)C(=CC=C2)OC(=O)NC)C</chem>                                           | $C_{12}H_{15}NO_3$       |
| 8   | Sorbitol octanoate | <chem>CCCCCCCC(=O)OC(C(C(C(C(CO)O)O)O)O)O</chem>                                        | $C_{14}H_{28}O_8$        |
| 9   | Methoprene         | <chem>CC(C)OC(=O)C=C(C)C=CCC(C)CCCC(C)(C)OC</chem>                                      | $C_{19}H_{34}O_3$        |
| 10  | Bifenazate         | <chem>CC(C)OC(=O)NNC1=C(C=CC(=C1)C2=CC=CC=C2)OC</chem>                                  | $C_{17}H_{20}N_2O_3$     |
| 11  | Bioallethrin       | <chem>CC1=C(C(=O)CC1OC(=O)C2C(C2(C)C)C=C(C)C)CC=C</chem>                                | $C_{19}H_{26}O_3$        |
| 12  | Fenazaquin         | <chem>CC(C)(C)C1=CC=C(C=C1)CCOC2=NC=NC3=CC=CC=C32</chem>                                | $C_{20}H_{22}N_2O$       |
| 13  | Amitraz            | <chem>CC1=CC(=C(C=C1)N=CN(C)C=NC2=C(C=C(C=C2)C)C)C</chem>                               | $C_{19}H_{23}N_3$        |
| 14  | Acequinocyl        | <chem>CCCCCCCCCCCCC1=C(C(=O)C2=CC=CC=C2C1=O)OC(=O)C</chem>                              | $C_{24}H_{32}O_4$        |
| 15  | Pyrethroids        | <chem>CC(=CC1C(C1(C)C)C(=O)OCC2=COC(=C2)CC3=CC=CC=C3)C</chem>                           | $C_{22}H_{26}O_3$        |
| 16  | Spirotetramat      | <chem>CCOC(=O)OC1=C(C(=O)NC12CCC(CC2)OC)C3=C(C=CC(=C3)C)C</chem>                        | $C_{21}H_{27}NO_5$       |
| 17  | Fenpropathrin      | <chem>CC1(C(C1(C)C)C(=O)OC(C#N)C2=CC(=CC=C2)OC3=CC=CC=C3)C</chem>                       | $C_{22}H_{23}NO_3$       |
| 18  | Rotenone           | <chem>CC(=C)C1CC2=C(O1)C=CC3=C2OC4COC5=CC(=C(C=C5C4C3=O)OC)OC</chem>                    | $C_{23}H_{22}O_6$        |
| 19  | Spiromesifen       | <chem>CC1=CC(=C(C(=C1)C)C2=C(C3(CCCC3)OC2=O)OC(=O)CC(C)(C)C)C</chem>                    | $C_{23}H_{30}O_4$        |
| 20  | Fenpyroximate      | <chem>CC1=NN(C(=C1C=NOCC2=CC=C(C=C2)C(=O)OC(C)(C)OC3=CC=CC=C3)C</chem>                  | $C_{24}H_{27}N_3O_4$     |
| 21  | Dinocap            | <chem>CCCCCCC(C)C1=CC(=C(C(=C1)[N+])(=O)[O-])OC(=O)C=CC([N+])(=O)[O-]</chem>            | $C_{18}H_{24}N_2O_6$     |
| 22  | Spinosad           | <chem>CCC1C(CCC2(O1)CC3CC(O2)CC=C(CC(C=CC=C4COC5C4(C(C=C(C5=NO)C)C(=O)O3)O)C)C)C</chem> | $C_{73}H_{110}N_2O_{17}$ |



|    |              |                                                                                                                                         |                                                                 |
|----|--------------|-----------------------------------------------------------------------------------------------------------------------------------------|-----------------------------------------------------------------|
| 23 | Allosamidin  | <chem>CC(=O)NC1C(C(C(OC1OC2C(OC(C(C2O)NC(=O)C)OC3C(C4C(C3O)N=C(O4)N(C)C)CO)C(O)CO)O)O</chem>                                            | C <sub>25</sub> H <sub>42</sub> N <sub>4</sub> O <sub>14</sub>  |
| 24 | Moxidectin   | <chem>CC1CC(=CCC2CC(CC3(O2)CC(=NOC)C(C(O3)C(=CC(C)C)C)C)OC(=O)C4C=C(C(C5C4(C(=CC=C1)CO5)O)O)C)C</chem>                                  | C <sub>37</sub> H <sub>53</sub> NO <sub>8</sub>                 |
| 25 | Spinosad     | <chem>CCC1CCCC(C(C(=O)C2=CC3C4CC(CC4C=CC3C2CC(=O)O1)OC5C(C(C(C(O5)C)OC)OC)OC)C)OC6CCC(C(O6)C)N(C)C</chem>                               | C <sub>73</sub> H <sub>110</sub> N <sub>2</sub> O <sub>17</sub> |
| 26 | Pyrethrin    | <chem>CC1=C(C(=O)CC1OC(=O)C2C(C2(C)C)C=C(C)C)CC=CC=C.CC1=C(C(=O)CC1OC(=O)C2C(C2(C)C)C=C(C)C(=O)OC)CC=CC=C</chem>                        | C <sub>43</sub> H <sub>56</sub> O <sub>8</sub>                  |
| 27 | Abamectin    | <chem>CC1C=CC=C2COC3C2(C(C=C(C3O)C)C(=O)OC4CC(CC=C(C1OC5CC(C(C(O5)C)OC6CC(C(C(O6)C)C)OC)OC)C)OC7(C4)C=CC(C(O7)C(C)C)C)O</chem>          | C <sub>48</sub> H <sub>72</sub> O <sub>13</sub>                 |
| 28 | Ivermectin   | <chem>CCC(C)C1C(CCC2(O1)CC3CC(O2)CC=C(C(C(C=CC=C4COC5C4(C(C=C(C5O)C)C(=O)O3)O)C)OC6CC(C(C(O6)C)OC7CC(C(C(O7)C)O)OC)OC)C)C</chem>        | C <sub>48</sub> H <sub>74</sub> O <sub>14</sub>                 |
| 29 | Pheromone    | <chem>CC(C)CC(C(=O)NC(CC1=CC=CC=C1)C(=O)NC(C(C)C)C(=O)NC(C(C)C)C(=O)NC(C(C)O)C(=O)NC(CC(C)C)C(=O)NC(C(C)C)C(=O)NCC(=O)O)N</chem>        | C <sub>42</sub> H <sub>70</sub> N <sub>8</sub> O <sub>10</sub>  |
| 30 | Avermectin   | <chem>CCC(C)C1C(C=CC2(O1)CC3CC(O2)CC=C(C(C(C=CC=C4COC5C4(C(C=C(C5O)C)C(=O)O3)O)C)OC6CC(C(C(O6)C)OC7CC(C(C(O7)C)O)OC)OC)C)C</chem>       | C <sub>48</sub> H <sub>72</sub> O <sub>14</sub>                 |
| 31 | Doramectin   | <chem>CC1C=CC=C2COC3C2(C(C=C(C3O)C)C(=O)OC4CC(CC=C(C1OC5CC(C(C(O5)C)OC6CC(C(C(O6)C)O)OC)OC)C)OC7(C4)C=CC(C(O7)C8CCCCC8)C)O</chem>       | C <sub>50</sub> H <sub>74</sub> O <sub>14</sub>                 |
| 32 | Eprinomectin | <chem>CCC(C)C1C(C=CC2(O1)CC3CC(O2)CC=C(C(C(C=CC=C4COC5C4(C(C=C(C5O)C)C(=O)O3)O)C)OC6CC(C(C(O6)C)OC7CC(C(C(O7)C)NC(=O)C)OC)OC)C)C</chem> | C <sub>50</sub> H <sub>75</sub> NO <sub>14</sub>                |

Table S2. Compounds identified from *Bacillus velezensis* W1 and the maximum similarity

| NO. | Compound name                       | SMILES                                  | maximum similarity |
|-----|-------------------------------------|-----------------------------------------|--------------------|
| 1   | 2-Pyrrolidinone                     | <chem>C1CC(=O)NC1</chem>                | 0.22               |
| 2   | 2-Piperidinone                      | <chem>C1CCNC(=O)C1</chem>               | 0.22               |
| 3   | Octadecane                          | <chem>CCCCCCCCCCCCCCCCCC</chem>         | 0.25               |
| 4   | Nonadecane                          | <chem>CCCCCCCCCCCCCCCCCC</chem>         | 0.25               |
| 5   | Bacimethrin                         | <chem>COC1=NC=C(C(=N1)N)CO</chem>       | 0.18               |
| 6   | Benzeneacetic acid                  | <chem>C1=CC=C(C=C1)CC(=O)O</chem>       | 0.3                |
| 7   | Benzenepropanoic acid, methyl ester | <chem>COC(=O)CCC1=CC=CC=C1</chem>       | 0.31               |
| 8   | Eicosane                            | <chem>CCCCCCCCCCCCCCCCCC</chem>         | 0.25               |
| 9   | Benzenepropanoic acid               | <chem>C1=CC=C(C=C1)CCC(=O)O</chem>      | 0.28               |
| 10  | Cyclo (Gly-Pro)                     | <chem>C1CC2C(=O)NCC(=O)N2C1</chem>      | 0.37               |
| 11  | Heneicosane                         | <chem>CCCCCCCCCCCCCCCCCC</chem>         | 0.25               |
| 12  | Benzenebutanoic acid                | <chem>C1=CC=C(C=C1)CCCC(=O)O</chem>     | 0.28               |
| 13  | Cyclo (Ala-Pro)                     | <chem>CC1C(=O)N2CCCC2C(=O)N1</chem>     | 0.38               |
| 14  | Docosane                            | <chem>CCCCCCCCCCCCCCCCCC</chem>         | 0.25               |
| 15  | Hexadecanoic acid, methyl ester     | <chem>CCCCCCCCCCCCCCCC(OC)=O</chem>     | 0.44               |
| 16  | Hexadecanoic acid, ethyl ester      | <chem>CCCCCCCCCCCCCCCC(OCC)=O</chem>    | 0.54               |
| 17  | Tricosane                           | <chem>CCCCCCCCCCCCCCCCCC</chem>         | 0.25               |
| 18  | Cyclo (Ala-Val)                     | <chem>CC1C(=O)NC(C(=O)N1)C(C)C</chem>   | 0.43               |
| 19  | Octadecanoic acid, methyl ester     | <chem>CCCCCCCCCCCCCCCCCC(=O)OC</chem>   | 0.44               |
| 20  | Propanol,3-(O-Azi,dophenyl)         | <chem>[N]=[N]=NC1=CC=CC=C1CCCO</chem>   | —                  |
| 21  | Pentacosane                         | <chem>CCCCCCCCCCCCCCCCCC</chem>         | 0.25               |
| 22  | Cyclo (Pro-Pro)                     | <chem>C1CC2C(=O)N3CCCC3C(=O)N2C1</chem> | 0.38               |

|    |                                    |                                                                                                                                                                      |      |
|----|------------------------------------|----------------------------------------------------------------------------------------------------------------------------------------------------------------------|------|
| 23 | cyclo (Pro-trans-4-OH-Pro)         | <chem>O=C(N1CC(O)CC12)C3CCCN3C2=O</chem>                                                                                                                             | 0.48 |
| 24 | Heptacosane                        | <chem>CCCCCCCCCCCCCCCCCCCCCCCCCC</chem>                                                                                                                              | 0.25 |
| 25 | Eicosane,7-hexyl-                  | <chem>CCCCCCCCCCCCCCC(CCCCC)CCCCC</chem>                                                                                                                             | 0.25 |
| 26 | Hexadecane, 2,6,10,14-tetramethyl- | <chem>CCC(C)CCCC(C)CCCC(C)CCCC(C)C</chem>                                                                                                                            | 0.46 |
| 27 | Cyclo (Gly-Phe)                    | <chem>C1C(=O)NC(C(=O)N1)CC2=CC=CC=C2</chem>                                                                                                                          | 0.66 |
| 28 | Cyclo (Leu-Leu)                    | <chem>CC(C)CC1C(=O)NC(C(=O)N1)CC(C)C</chem>                                                                                                                          | 0.44 |
| 29 | Ethyl citrate                      | <chem>O=C(OCC)CC(C(OCC)=O)(O)CC(OCC)=O</chem>                                                                                                                        | 0.46 |
| 30 | Cyclo (Gly-Tyr)                    | <chem>C1C(=O)NC(C(=O)N1)CC2=CC=C(C=C2)O</chem>                                                                                                                       | 0.61 |
| 31 | Cyclo (Phe-Pro)                    | <chem>C1CC2C(=O)NC(C(=O)N2C1)CC3=CC=CC=C3</chem>                                                                                                                     | 0.66 |
| 32 | Cyclo (Phe-Leu)                    | <chem>CC(C)CC1C(=O)NC(C(=O)N1)CC2=CC=CC=C2</chem>                                                                                                                    | 0.75 |
| 33 | Cyclo (Phe-trans-4-OH-Pro)         | <chem>C1C(CN2C1C(=O)NC(C2=O)CC3=CC=CC=C3)O</chem>                                                                                                                    | 0.73 |
| 34 | Cyclo (Tyr-trans-4-OH-Pro)         | <chem>O=C(NC(CC1=CC=C(O)C=C1)C2=O)C3N2CC(O)C3</chem>                                                                                                                 | 0.68 |
| 35 | Macrolactin A                      | <chem>CC1CCCC=CC=CC(CC(CC=CC=CC(CC=CC=CC(=O)O1)O)O)O</chem>                                                                                                          | 0.54 |
| 36 | Macrolactin A, 7-O-malonyl-        | <chem>CC1CCCC=CC=CC(CC(CC=CC=CC(CC=CC=CC(=O)O1)OC(=O)C<br/>C(=O)O)O)O</chem>                                                                                         | 0.48 |
| 37 | Surfactin C14                      | <chem>CC(C)CCCCCCCCC1CC(=O)NC(C(=O)NC(C(=O)NC(C(=O)NC(C(=O)NC(C(=O)NC(C(=O)NC(C(=O)NC(C(=O)NC(C(=O)O1)CC(C)C)CC(C)C)CC(=O)O)C<br/>(C)C)CC(C)C)CC(C)C)CCC(=O)O</chem> | 0.48 |
| 38 | Surfactin C15                      | <chem>CC(C)CCCCCCCCCC1CC(=O)NC(C(=O)NC(C(=O)NC(C(=O)NC(C(=O)NC(C(=O)NC(C(=O)NC(C(=O)O1)CC(C)C)CC(C)C)CC(=O)O)C<br/>C(C)C)CC(C)C)CC(C)C)CCC(=O)O</chem>               | 0.48 |
| 39 | Bacillomycin D C13                 | <chem>O=C(C(CC(NC(C(CC1=CC=C(C=C1)O)NC(C(CC(N)=O)NC(CC(N2)<br/>)CCCCCCCCC)=O)=O)=O)=O)N)N3C(C(NC(CCC(O)=O)C(NC(C<br/>O)C(NC(C(C)O)C2=O)=O)=O)=O)CCC3</chem>          | 0.67 |
| 40 | Bacillomycin D C14                 | <chem>O=C(C(CC(NC(C(CC1=CC=C(C=C1)O)NC(C(CC(N)=O)NC(CC(N2)<br/>)CCCCCCCCC)=O)=O)=O)=O)N)N3C(C(NC(CCC(O)=O)C(NC(C<br/>CO)C(NC(C(C)O)C2=O)=O)=O)=O)CCC3</chem>         | 0.67 |
| 41 | Bacillomycin D C15                 | <chem>O=C(C(CC(NC(C(CC1=CC=C(C=C1)O)NC(C(CC(N)=O)NC(CC(N2)<br/>)CCCCCCCCC)=O)=O)=O)=O)N)N3C(C(NC(CCC(O)=O)C(NC</chem>                                                | 0.67 |

|    |                    |                                                                                                                                         |      |
|----|--------------------|-----------------------------------------------------------------------------------------------------------------------------------------|------|
|    |                    | (CO)C(NC(C(C)O)C2=O)=O)=O)CCC3                                                                                                          |      |
| 42 | Bacillomycin D C16 | O=C(C(CC(NC(C(CC1=CC=C(C=C1)O)NC(C(CC(N)=O)NC(CC(N2)CCCCCCCCCCCCC)=O)=O)=O)=O)N)N3C(C(NC(CCC(O)=O)C(NC(CO)C(NC(C(C)O)C2=O)=O)=O)=O)CCC3 | 0.67 |
| 43 | Bacillomycin D C17 | O=C(C(CC(NC(C(CC1=CC=C(C=C1)O)NC(C(CC(N)=O)NC(CC(N2)CCCCCCCCCCCCC)=O)=O)=O)=O)N)N3C(C(NC(CCC(O)=O)C(NC(CO)C(NC(C(C)O)C2=O)=O)=O)=O)CCC3 | 0.67 |
